# Supplementary material for: Important Food Sources of Fructose‐Containing Sugars and Incident Hypertension: A Systematic Review and Dose‐Response Meta‐Analysis of Prospective Cohort Studies
Source: PubMed Central journal article supplement (PMC6951071; doi:10.1161/jaha.118.010977), 2019-12-12
Supplement: JAH3-8-e010977-s001.pdf [file JAH3-8-e010977-s001.pdf]

# **SUPPLEMENTAL MATERIAL**

## Data S1. Sample STATA dose-response code - SSBs intake and incident hypertension.

```
clear

version 15

import excel "[usedataset]", sheet("forStata") firstrow case(lower)
sort id quintile
list rr lci uci case id doseinml quintile
tab id

capture drop lnrr
capture drop lnse

gen type=2
gen lnrr=log(rr)
gen lnuci=log(uci)
gen lnlci=log(lci)
gen lnse =((lnuci-lnlci)/(2*invnorm(0.975)))
gen dose=doseinml

* scale check
sum dose, d

* linear DR
drmeta lnrr dose, data(py case) id(id) type(type) se(lnse) eform reml
lincom dose*355, eform //per 355 ml score
return list
global b0=r(estimate)
global b1: display %4.2f r(estimate)
global lci1: display %04.2f r(lb)
global uci1: display %04.2f r(ub)
global p1: display %04.3f r(p)
if $p1<0.0001 {
global p1="<0.0001"
else {
global p1="= $p1"
}
}
global captionlinear= "RR{sub:per 355 ml/per-serving} $b1 [95% CI $lci1, $uci1] {&bull} P{sub:linear} = $p1"
drmeta_gof //goodness of fit for linear - Deviance=59.5 [lower better], R2=0.66 [higher better]
drmeta lnrr dose, data(py case) id(id) type(type) se(lnse) eform reml
lincom dose*1, //per 1 score
global eb1=r(estimate)
display $eb1

* non-linear using splines
capture drop doses1
capture drop doses2
sum dose, d
mkspline doses = dose, nk(3) cubic displayknots
mat knots = r(knots)

*departure from linearity
drmeta lnrr doses1 doses2 , data(py case) id(id) type(type) se(lnse) reml
testparm doses2 //wald test test
global pdep0 r(p)
global pdep1: display %5.3f $pdep0
display $pdep1 //
global pnl ="P-value{sub:non-linearity}s = $pdep1"

* dose estimate non-linearity
```

```

global dl=355 //dose to show RR for 355 ml
drmeta lnrr doses1 doses2 , data(py case) id(id) type(type) se(lnse) reml
drmeta_graph, dose($dl) ref(0) matk(knots) eform list nodraw
matrix r=r(E)
global b$dl: display %4.2f r["r1","_xb"]
global lci$dl: display %04.2f r["r1","_lb"]
global uci$dl: display %04.2f r["r1","_ub"]
global rr$dl= "RR{sub:$dl g} ${b$dl} [${lci$dl}, ${uci$dl}]"
display "${rr$dl}"

global captionnl="$pnl {&bull} {it:${rr$dl}}"

tabstat rr dose, stat(min max)

global xtitle="xtitle(Consumption (g/day))"
global doserange= "dose(0(5)1400)"
global ytitle="ytitle(Relative Risk)"
global yscale="yscale(range(0.9 1.4)) ylabel(0.9 1 1.2 1.4, format(%5.2g))"
global yline="yline(1, lcol(red) lw(thick) lp(.))"
global title="t1title(Sugar-sweetened beverages)"

* non-linear with linear line with bubbles
drmeta lnrr doses1 doses2 , data(py case) id(id) type(type) se(lnse) eform reml
drmeta_graph, ref(0) matk(knots) eform addplot($eb1*d) $xtitle $doserange $ytitle $yscale $yline $title
graph addplot scatter rr dose if quintile==1, mfcolor(gs13) mlcolor(gs10) below jitter(2) $yscale
graph addplot scatter rr dose[w=1/lnse^2] if quintile!=1, mcolor(gs15) ms(circle) below $yscale
note("$captionlinear" " " "$captionnl", size(vsmall) color(gs1) box)
graph export "ssb-spline-1a.pdf", replace

* non-linear with linear line without bubbles
drmeta lnrr doses1 doses2 , data(py case) id(id) type(type) se(lnse) reml
drmeta_graph , ref(0) matk(knots) eform addplot($eb1*d) note("$captionlinear" " " "$captionnl",
size(vsmall) color(gs1) box) $xtitle $doserange $ytitle $yscale $yline $title
graph export "ssb-spline-1b.pdf", replace

```

**Data S2. Dose-response raw data.**

| Study - Cohort                                 | Dietary Assessment | Exposure (median)  | Relative Risk (95% CI)                |
|------------------------------------------------|--------------------|--------------------|---------------------------------------|
| <b>SSBs</b>                                    |                    |                    |                                       |
| Barrio-Lopez et al., 2013 – SUN <sup>1</sup>   | Validated FFQ      | 0 ml/d             | 1.00 (Reference)                      |
|                                                |                    | 165 ml/d           | 1.30 (1.10, 1.80)                     |
|                                                |                    | 330 ml/d           | 1.60 (1.30, 2.10)                     |
| Cohen et al., 2012 – NHS <sup>2</sup>          | Validated FFQ      | 12 ml/d            | 1.00 (Reference)                      |
|                                                |                    | 29 ml/d            | 1.02 (0.99, 1.04)                     |
|                                                |                    | 203 ml/d           | 1.04 (1.01, 1.07)                     |
|                                                |                    | 355 ml/d           | 1.12 (1.08, 1.17)                     |
| Cohen et al., 2012 – NHSII <sup>2</sup>        | Validated FFQ      | 12 ml/d            | 1.00 (Reference)                      |
|                                                |                    | 29 ml/d            | 1.00 (0.96, 1.04)                     |
|                                                |                    | 203 ml/d           | 1.07 (1.03, 1.11)                     |
|                                                |                    | 355 ml/d           | 1.17 (1.11, 1.23)                     |
| Cohen et al., 2012 – HPFS <sup>2</sup>         | Validated FFQ      | 12 ml/d            | 1.00 (Reference)                      |
|                                                |                    | 29 ml/d            | 0.97 (0.93, 1.02)                     |
|                                                |                    | 203 ml/d           | 1.04 (1.00, 1.10)                     |
|                                                |                    | 355 ml/d           | 1.06 (0.99, 1.14)                     |
| Dhingra et al., 2007 – FOC <sup>3</sup>        | Validated FFQ      | 0 ml/d             | 1.00 (Reference)                      |
|                                                |                    | 355 ml/d           | 1.12 (0.94, 1.34)                     |
|                                                |                    | 533 ml/d           | 1.14 (0.97, 1.32)                     |
|                                                |                    | 710 ml/d           | 1.15 (0.92, 1.42)                     |
| Duffey et al., 2010 – CARDIA <sup>4</sup>      | Validated SFFQ     | 0 ml/d<br>337 ml/d | 1.00 (Reference)<br>1.06 (0.97, 1.16) |
| Kang et al., 2017 – KoGES <sup>5</sup>         | Validated SFFQ     | 0 ml/d             | 1.00 (Reference)                      |
|                                                |                    | 36 ml/d            | 0.93 (0.83, 1.04)                     |
|                                                |                    | 71 ml/d            | 1.28 (1.12, 1.48)                     |
|                                                |                    | 143 ml/d           | 1.55 (1.18, 2.03)                     |
| Kwak et al., 2018 – KoGES <sup>6</sup>         | Validated SFFQ     | 0 ml/d             | 1.00 (Reference)                      |
|                                                |                    | 58 ml/d            | 1.04 (0.87, 1.24)                     |
|                                                |                    | 208 ml/d           | 1.12 (0.95, 1.33)                     |
|                                                |                    | 875 ml/d           | 1.21 (1.02, 1.45)                     |
| Mirmiran et al. 2015 – TLGS <sup>7</sup>       | Validated SFFQ     | 1 ml/d             | 1.00 (Reference)                      |
|                                                |                    | 9 ml/d             | 0.80 (0.27, 2.33)                     |
|                                                |                    | 33 ml/d            | 1.35 (0.50, 3.51)                     |
|                                                |                    | 100 ml/d           | 2.59 (1.05, 5.97)                     |
| Sayon-Orea et al., 2015 – SUN <sup>8</sup>     | Validated SFFQ     | 0 ml/d             | 1.00 (Reference)                      |
|                                                |                    | 99 ml/d            | 1.07 (0.94, 1.22)                     |
|                                                |                    | 198 ml/d           | 1.34 (1.09, 1.65)                     |
| Weng et al., 2013 – ARIC <sup>9</sup>          | Validated FFQ      | 0 ml/d             | 1.00 (Reference)                      |
|                                                |                    | 178 ml/d           | 1.11 (1.01, 1.23)                     |
|                                                |                    | 355 ml/d           | 1.02 (0.90, 1.16)                     |
| Winkelmayer et al., 2005 – NHS <sup>10</sup>   | Validated FFQ      | 0 ml/d             | 1.00 (Reference)                      |
|                                                |                    | 355 ml/d           | 1.09 (0.98, 1.22)                     |
|                                                |                    | 888 ml/d           | 1.11 (0.95, 1.30)                     |
|                                                |                    | 1420 ml/d          | 1.44 (0.98, 2.11)                     |
| Winkelmayer et al., 2005 – NHSII <sup>10</sup> | Validated FFQ      | 0 ml/d             | 1.00 (Reference)                      |
|                                                |                    | 355 ml/d           | 1.13 (1.03, 1.24)                     |
|                                                |                    | 888 ml/d           | 1.24 (1.11, 1.38)                     |
|                                                |                    | 1420 ml/d          | 1.28 (1.01, 1.62)                     |
| <b>Fruit</b>                                   |                    |                    |                                       |
| Auerbach et al., 2017 – WHI <sup>11</sup>      | Validated SFFQ     | 26 g/d<br>61 g/d   | 1.00 (Reference)<br>1.00 (0.99, 1.04) |

|                                                               |                |                                                     |                                                                                                      |
|---------------------------------------------------------------|----------------|-----------------------------------------------------|------------------------------------------------------------------------------------------------------|
|                                                               |                | 79 g/d<br>140 g/d<br>210 g/d                        | 1.01 (0.98, 1.04)<br>1.00 (0.97, 1.03)<br>1.02 (0.98, 1.04)                                          |
| Borgi et al., 2016 – NHS <sup>12</sup>                        | Validated FFQ  | 50 g/d<br>69 g/d<br>88 g/d<br>219 g/d<br>350 g/d    | 1.00 (Reference)<br>0.97 (0.93, 1.01)<br>0.95 (0.92, 0.99)<br>0.94 (0.91, 0.98)<br>0.96 (0.88, 1.03) |
| Borgi et al., 2016 – NHSII <sup>12</sup>                      |                | 50 g/d<br>69 g/d<br>88 g/d<br>219 g/d<br>350 g/d    | 1.00 (Reference)<br>1.03 (0.99, 1.07)<br>0.97 (0.94, 1.07)<br>0.91 (0.87, 0.95)<br>0.91 (0.81, 1.02) |
| Borgi et al., 2016 – HPFS <sup>12</sup>                       |                | 50 g/d<br>69 g/d<br>88 g/d<br>219 g/d<br>350 g/d    | 1.00 (Reference)<br>0.95 (0.89, 1.00)<br>0.92 (0.88, 0.97)<br>0.92 (0.87, 0.97)<br>0.88 (0.81, 0.97) |
| Kim et al. J Acad Nutr, 2017 – KoGES <sup>13</sup><br>(men)   | Validated SFFQ | 0 g/d<br>150 g/d<br>300 g/d<br>400 g/d              | 1.00 (Reference)<br>0.58 (0.45, 0.75)<br>0.44 (0.34, 0.57)<br>0.44 (0.32, 0.60)                      |
| Kim et al. J Acad Nutr, 2017 – KoGES <sup>13</sup><br>(women) |                | 0 g/d<br>150 g/d<br>300 g/d<br>400 g/d              | 1.00 (Reference)<br>0.71 (0.54, 0.95)<br>0.44 (0.33, 0.58)<br>0.33 (0.24, 0.45)                      |
| Koochakpoor et al., 2018 – TLGS <sup>14</sup>                 | Validated SFFQ | 0 g/d<br>80 g/d<br>200 g/d<br>320 g/d               | 1.00 (Reference)<br>0.83 (0.68, 1.40)<br>0.97 (0.58, 1.77)<br>0.89 (0.63, 1.30)                      |
| Nunez-Cordoba et al., 2009 – SUN <sup>15</sup>                | Validated SFFQ | 160 g/d<br>248 g/d<br>408 g/d<br>568 g/d<br>640 g/d | 1.00 (Reference)<br>0.86 (0.66, 1.13)<br>0.94 (0.70, 1.27)<br>1.02 (0.72, 1.27)<br>0.85 (0.59, 1.22) |
| Psaltopoulou et al., 2004 – EPIC <sup>16</sup>                | Validated SFFQ | 106 g/d<br>318 g/d                                  | 1.00 (Reference)<br>0.61 (0.45, 0.83)                                                                |
| Steffen et al., 2005 – CARDIA <sup>17</sup>                   | Validated SFFQ | 2 g/d<br>31 g/d<br>61 g/d<br>105 g/d<br>131 g/d     | 1.00 (Reference)<br>0.88 (0.72, 1.06)<br>0.83 (0.68, 1.01)<br>0.85 (0.69, 1.04)<br>0.75 (0.60, 0.94) |
| Tsubota-Utsugi et al., 2011 – Ohasama <sup>18</sup>           | Validated FFQ  | 38 g/d<br>51 g/d<br>82 g/d<br>100 g/d               | 1.00 (Reference)<br>0.73 (0.46, 1.09)<br>0.78 (0.50, 1.16)<br>0.51 (0.29, 0.81)                      |
| Wang et al., 2012 – WHS <sup>19</sup>                         | Validated FFQ  | 44 g/d<br>88 g/d<br>153 g/d<br>219 g/d<br>263 g/d   | 1.00 (Reference)<br>0.99 (0.92, 1.06)<br>0.98 (0.90, 1.06)<br>0.98 (0.91, 1.06)<br>0.95 (0.88, 1.04) |
| Weng et al., 2013 – ARIC <sup>9</sup>                         | Validated FFQ  | 89 g/d<br>123 g/d<br>153 g/d<br>181 g/d             | 1.00 (Reference)<br>1.06 (0.94, 1.19)<br>0.98 (0.87, 1.10)<br>1.08 (0.96, 1.22)                      |

|                                                     |                |                                                      |                                                                                                      |
|-----------------------------------------------------|----------------|------------------------------------------------------|------------------------------------------------------------------------------------------------------|
|                                                     |                | 225 g/d                                              | 1.06 (0.93, 1.20)                                                                                    |
| <b>Yogurt</b>                                       |                |                                                      |                                                                                                      |
| Alonso et al., 2009 – ARIC <sup>20</sup>            | Validated FFQ  | 2 g/d<br>74 g/d<br>319 g/d                           | 1.00 (Reference)<br>1.01 (0.89, 1.14)<br>1.11 (0.86, 1.41)                                           |
| Buendia et al., 2018 – NHS <sup>21</sup>            | Validated SFFQ | 7 g/d<br>22 g/d<br>53 g/d<br>123 g/d<br>175 g/d      | 1.00 (Reference)<br>1.00 (0.97, 1.02)<br>0.99 (0.96, 1.01)<br>0.95 (0.92, 0.98)<br>0.87 (0.81, 0.94) |
| Buendia et al., 2018 – NHSII <sup>21</sup>          |                | 7 g/d<br>22 g/d<br>53 g/d<br>123 g/d<br>175 g/d      | 1.00 (Reference)<br>0.96 (0.93, 1.00)<br>0.95 (0.92, 0.98)<br>0.93 (0.90, 0.97)<br>0.89 (0.82, 0.96) |
| Buendia et al., 2018 – HPFS <sup>21</sup>           |                | 7 g/d<br>22 g/d<br>53 g/d<br>123 g/d<br>175 g/d      | 1.00 (Reference)<br>0.98 (0.93, 1.02)<br>0.94 (0.89, 0.99)<br>0.95 (0.89, 1.01)<br>1.01 (0.89, 1.15) |
| Engberink et al., 2009 – MORGEN <sup>22</sup>       |                | Validated SFFQ                                       | 12 g/d<br>29 g/d<br>70 g/d<br>122 g/d                                                                |
| Kim et al., Brit J Nutr, 2017 – KoGES <sup>23</sup> | Validated SFFQ | 0 g/d<br>20 g/d<br>49 g/d<br>78 g/d                  | 1.00 (Reference)<br>0.67 (0.58, 0.76)<br>0.71 (0.62, 0.81)<br>0.71 (0.59, 0.85)                      |
| Steffen et al., 2005 – CARDIA <sup>24</sup>         | Validated SFFQ | 4 g/d<br>11 g/d<br>18 g/d                            | 1.00 (Reference)<br>1.00 (0.83, 1.20)<br>0.88 (0.75, 1.04)                                           |
| Wang et al., 2008 – WHS <sup>17</sup>               | Validated SFFQ | 8 g/d<br>16 g/d<br>88 g/d<br>193 g/d                 | 1.00 (Reference)<br>0.95 (0.90, 1.01)<br>0.95 (0.89, 1.01)<br>0.93 (0.81, 1.07)                      |
| Wang et al., 2015 – FHS <sup>25</sup>               | Validated FFQ  | 0 g/d<br>227 g/d                                     | 1.00 (Reference)<br>0.95 (0.90, 0.99)                                                                |
| <b>Dairy Desserts</b>                               |                |                                                      |                                                                                                      |
| Alonso et al., 2009 – ARIC <sup>17</sup>            | Validated FFQ  | 14 ml/d<br>273 ml/d<br>533 ml/d                      | 1.00 (Reference)<br>0.91 (0.83, 0.99)<br>0.88 (0.74, 1.04)                                           |
| Steffen et al., 2005 – CARDIA <sup>20</sup>         | Validated SFFQ | 4 ml/d<br>21 ml/d<br>40 ml/d<br>72 ml/d<br>93 ml/d   | 1.00 (Reference)<br>0.81 (0.67, 0.98)<br>0.87 (0.71, 1.05)<br>0.79 (0.65, 0.97)<br>0.74 (0.60, 0.92) |
| Wang et al., 2008 – WHS <sup>22</sup>               | Validated SFFQ | 8 ml/d<br>17 ml/d<br>89 ml/d<br>196 ml/d<br>250 ml/d | 1.00 (Reference)<br>1.08 (1.02, 1.14)<br>1.04 (0.97, 1.10)<br>1.13 (0.98, 1.31)<br>0.90 (0.76, 1.07) |
| <b>100% Fruit Juice</b>                             |                |                                                      |                                                                                                      |
| Auerbach et al., 2017 – WHI <sup>4</sup>            | Validated SFFQ | 0 ml/d<br>30 ml/d<br>77 ml/d                         | 1.00 (Reference)<br>0.98 (0.94, 1.01)<br>0.97 (0.94, 1.01)                                           |

|                                            |                |          |                   |
|--------------------------------------------|----------------|----------|-------------------|
|                                            |                | 145 ml/d | 0.98 (0.94, 1.01) |
|                                            |                | 231 ml/d | 1.01 (0.97, 1.04) |
| Duffey et al., 2010 – CARDIA <sup>13</sup> | Validated SFFQ | 0 ml/d   | 1.00 (Reference)  |
|                                            |                | 114 ml/d | 0.89 (0.82, 0.97) |
| <b>Fruit Drinks</b>                        |                |          |                   |
| Mirmiran et al. 2015 – TLGS <sup>7</sup>   | Validated SFFQ | 1 ml/d   | 1.00 (Reference)  |
|                                            |                | 8 ml/d   | 2.00 (0.71, 5.66) |
|                                            |                | 20 ml/d  | 1.91 (0.65, 5.60) |
|                                            |                | 67 ml/d  | 1.28 (0.04, 3.94) |
| <b>Sweet Snacks</b>                        |                |          |                   |
| Asghari et al., 2016 – TLGS <sup>26</sup>  | Validated SFFQ | 7 g/d    | 1.00 (Reference)  |
|                                            |                | 19 g/d   | 1.17 (0.45, 3.93) |
|                                            |                | 35 g/d   | 2.49 (0.82, 7.59) |
|                                            |                | 73 g/d   | 2.18 (0.70, 6.81) |

**Table S1. Search terms.**

| MEDLINE                              | EMBASE                              | Cochrane                                 |
|--------------------------------------|-------------------------------------|------------------------------------------|
| 1 sugar*.mp.                         | 1 sugar*.mp.                        | 1 sugar*.mp.                             |
| 2 exp fructose/                      | 2 exp sugar/                        | 2 exp fructose/                          |
| 3 fructose.mp.                       | 3 exp fructose/                     | 3 fructose.mp.                           |
| 4 HFCS.mp.                           | 4 fructose.mp.                      | 4 HFCS.mp.                               |
| 5 exp High Fructose Corn Syrup/      | 5 HFCS.mp.                          | 5 exp Nutritive Sweeteners/              |
| 6 sucrose.mp.                        | 6 exp high fructose corn syrup/     | 6 sucrose.mp.                            |
| 7 exp Dietary Sucrose/               | 7 sucrose.mp.                       | 7 exp dietary sucrose/                   |
| 8 sugar sweetened beverage*.mp.      | 8 exp dietary sucrose/              | 8 sugar sweetened beverage*.mp.          |
| 9 SSB.mp.                            | 9 sugar sweetened beverage*.mp.     | 9 ssb.mp.                                |
| 10 soda.mp.                          | 10 SSB.mp.                          | 10 soda.mp.                              |
| 11 soft drink*.mp.                   | 11 soda.mp.                         | 11 soft drink*.mp.                       |
| 12 exp Carbonated Beverages/         | 12 soft drink*.mp.                  | 12 exp carbonated beverages/             |
| 13 carbonated beverages.mp.          | 13 exp soft drink/                  | 13 non alcoholic beverage*.mp.           |
| 14 non alcoholic beverage*.mp.       | 14 exp Carbonated Beverages/        | 14 nonalcoholic beverage*.mp.            |
| 15 nonalcoholic beverage*.mp.        | 15 carbonated beverages.mp.         | 15 exp energy drinks/                    |
| 16 exp Energy Drinks/                | 16 non alcoholic beverage*.mp.      | 16 energy drink*.mp.                     |
| 17 energy drink*.mp.                 | 17 nonalcoholic beverage*.mp.       | 17 smoothie*.mp.                         |
| 18 smoothie*.mp.                     | 18 exp energy drink/                | 18 ((fruit or vegetable) and juice*).mp. |
| 19 exp "Fruit and Vegetable Juices"/ | 19 energy drink*.mp.                | 19 fruit.mp.                             |
| 20 fruit.mp.                         | 20 smoothie*.mp.                    | 20 exp fruit/                            |
| 21 exp Fruit/                        | 21 exp "fruit and vegetable juice"/ | 21 exp honey/                            |
| 22 exp Honey/                        | 22 fruit.mp.                        | 22 y*g*rt.mp.                            |
| 23 y*g*rt.mp.                        | 23 exp fruit/                       | 23 exp yogurt/                           |
| 24 exp Yogurt/                       | 24 exp honey/                       | 24 ice cream*.mp.                        |
| 25 ice cream*.mp.                    | 25 y*g*rt.mp.                       | 25 icecream*.mp.                         |
| 26 icecream*.mp.                     | 26 exp yoghurt/                     | 26 exp ice cream/                        |
| 27 exp Ice Cream/                    | 27 exp ice cream/                   | 27 cereal*.mp.                           |
| 28 cereal*.mp.                       | 28 ice cream*.mp.                   | 28 dessert*.mp.                          |
| 29 exp edible grain/                 | 29 icecream*.mp.                    | 29 sweets.mp.                            |
| 30 dessert*.mp.                      | 30 cereal*.mp.                      | 30 confection*.mp.                       |
| 31 sweets.mp.                        | 31 dessert*.mp.                     | 31 pastries.mp.                          |
| 32 confection*.mp.                   | 32 sweets.mp.                       | 32 biscuit*.mp.                          |
| 33 pastries.mp.                      | 33 confection*.mp.                  | 33 cookie*.mp.                           |
| 34 biscuit*.mp.                      | 34 exp bakery product/              | 34 cake*.mp.                             |
| 35 cookie*.mp.                       | 35 pastries.mp.                     | 35 candy.mp.                             |
| 36 cake*.mp.                         | 36 biscuit*.mp.                     | 36 candies.mp.                           |
| 37 candy.mp.                         | 37 cookie*.mp.                      | 37 exp candy/                            |



**Table S1.** Search terms (Continued)

| MEDLINE                             | EMBASE                                      | Cochrane                                    |
|-------------------------------------|---------------------------------------------|---------------------------------------------|
| 38 candies.mp.                      | 38 cake*.mp.                                | 38 (chocolate adj2 milk).mp.                |
| 39 exp Candy/                       | 39 candy.mp.                                | 39 chocolate.mp                             |
| 40 (chocolate adj2 milk).mp.        | 40 candies.mp.                              | 40 exp cacao/                               |
| 41 exp chocolate/                   | 41 (chocolate adj2 milk).mp.                | 41 cacao.mp                                 |
| 42 chocolate.mp                     | 42 exp chocolate/                           | 42 or/1-41                                  |
| 43 exp cacao/                       | 43 chocolate.mp                             | 43 cohort.mp.                               |
| 44 cacao.mp                         | 44 exp cacao/                               | 44 exp Prospective Studies/                 |
| 45 or/1-44                          | 45 cacao.mp                                 | 45 (prospective adj2 (cohort or study)).mp. |
| 46 cohort.mp.                       | 46 or/1-45                                  | 46 exp follow-up studies/                   |
| 47 exp prospective study/           | 47 cohort.mp.                               | 47 exp multivariate analysis/               |
| (prospective adj2 (cohort or        |                                             |                                             |
| study)).mp.                         | 48 exp prospective study/                   | 48 exp proportional hazards models/         |
| 49 exp Follow-Up Studies/           | 49 (prospective adj2 (cohort or study)).mp. | 49 follow up study.mp.                      |
| 50 exp Multivariate Analysis/       | 50 exp multivariate analysis/               | 50 (longitudinal adj2 study).mp.            |
| 51 exp Proportional Hazards Models/ | 51 exp proportional hazards model/          | 51 or/43-50                                 |
| 52 follow up study.mp.              | 52 follow up study.mp.                      | 52 hypertensive*.mp.                        |
| 53 (longitudinal adj2 study).mp.    | 53 (longitudinal adj2 study).mp.            | 53 exp Hypertension/                        |
| 54 or/46-53                         | 54 or/47-53                                 | 54 hypertension*.mp.                        |
| 55 hypertensive*.mp.                | 55 hypertensive*.mp.                        | 55 HTN.mp.                                  |
| 56 exp Hypertension/                | 56 exp Hypertension/                        | 56 blood pressure.mp.                       |
| 57 hypertension*.mp.                | 57 hypertension*.mp.                        | 57 exp Blood Pressure/                      |
| 58 HTN.mp.                          | 58 HTN.mp.                                  | 58 systolic blood pressure.mp.              |
| 59 blood pressure.mp.               | 59 blood pressure.mp.                       | 59 SBP.mp.                                  |
| 60 exp Blood Pressure/              | 60 exp Blood Pressure/                      | 60 diastolic blood pressure.mp.             |
| 61 systolic blood pressure.mp.      | 61 systolic blood pressure.mp.              | 61 DBP.mp.                                  |
| 62 SBP.mp.                          | 62 SBP.mp.                                  | 62 or/52-61                                 |
| 63 diastolic blood pressure.mp.     | 63 diastolic blood pressure.mp.             | 63 and/42,51,62                             |
| 64 DBP.mp.                          | 64 DBP.mp.                                  |                                             |
| 65 or/55-64                         | 65 or/55-64                                 |                                             |
| 66 and/45,54,65                     | 66 and/46,54,65                             |                                             |

| Database                       | Total        |
|--------------------------------|--------------|
| MEDLINE: December week 2 2018  | 1,063        |
| EMBASE: December week 2 2018   | 2,428        |
| Cochrane: December week 2 2018 | 173          |
| Manual search                  | 5            |
| <b>Total</b>                   | <b>3,669</b> |

The original search was conducted November week 1 2016. The search was updated twice, to December week 2 2018.

**Table S2. Definitions of food categories.**

| Sugar-sweetened beverages (SSBs)                         |                                                                                                                                                                |
|----------------------------------------------------------|----------------------------------------------------------------------------------------------------------------------------------------------------------------|
| Barrio-Lopez et al., 2013 – SUN <sup>1</sup>             | Sugar-sweetened carbonated colas; fruit-flavoured carbonated sugar soft drinks                                                                                 |
| Cohen et al., 2012 – NHS, NHSII, HPFS <sup>2</sup>       | Sugar-sweetened cola; sugar-sweetened caffeine-free cola; sugar-sweetened non-cola; and fruit punch or other sugar-sweetened fruit drink                       |
| Dhingra et al., 2007 – FOC <sup>3</sup>                  | Soft drinks (Coke, Pepsi, Sprite, or other carbonated soft drinks) – caffeinated or non-caffeinated                                                            |
| Duffey et al., 2010 – CARDIA <sup>4</sup>                | Sugar-sweetened soda; fruit drinks                                                                                                                             |
| Kang et al., 2017 – KoGES <sup>5</sup>                   | Soft drinks (carbonated beverages, e.g., Cola and Sprite)                                                                                                      |
| Kwak et al., 2018 – KoGES <sup>6</sup>                   | Soft drinks (coke or sprite) and other sweetened drinks (sweetened rice drink and sweetened citrus tea)                                                        |
| Mirmiran et al., 2015 – TLGS <sup>7</sup>                | Sugar-sweetened carbonated soft drinks                                                                                                                         |
| Sayon-Orea et al., 2015 – SUN <sup>8</sup>               | Sugar-sweetened carbonated colas; fruit-flavored carbonated sugar soft drinks                                                                                  |
| Weng et al., 2013 – ARIC <sup>9</sup>                    | Not specified                                                                                                                                                  |
| Winkelmayer et al., 2005 – NHS, NHSII <sup>10</sup>      | Regular cola (Coke, Pepsi, or other cola beverages with sugar)                                                                                                 |
| Fruit                                                    |                                                                                                                                                                |
| Borgi et al., 2016 – NHS, NHSII, HPFS <sup>11</sup>      | Whole fruits: raisins/grapes; fresh apples/pears; bananas; strawberries; blueberries; prunes; avocado; cantaloupe; oranges; peaches/apricots/plums             |
| Kim et al., J Acad Nutr Diet, 2017 – KoGES <sup>12</sup> | Tangerines, oranges, persimmon or dried persimmon, watermelon, strawberry, grape, pear, oriental melon/melon, peach or prune, apple, banana, and tomato        |
| Auerbach et al., 2017 – WHI <sup>13</sup>                | Not specified                                                                                                                                                  |
| Koochakpoor et al., 2018 – TLGS <sup>14</sup>            |                                                                                                                                                                |
| Nunez-Cordoba et al., 2009 – SUN <sup>15</sup>           |                                                                                                                                                                |
| Psaltopoulou et al., 2004 – EPIC <sup>16</sup>           |                                                                                                                                                                |
| Steffen et al., 2005 – CARDIA <sup>17</sup>              |                                                                                                                                                                |
| Tsubota-Utsugi et al., 2011 – Ohasama <sup>18</sup>      |                                                                                                                                                                |
| Wang et al., 2012 – WHS <sup>19</sup>                    |                                                                                                                                                                |
| Weng et al., 2013 – ARIC <sup>9</sup>                    |                                                                                                                                                                |
| Yogurt                                                   |                                                                                                                                                                |
| Wang et al., 2008 – WHS <sup>20</sup>                    | Low-fat yogurt                                                                                                                                                 |
| Buendia et al., 2018 – NHS, NHSII, HPFS <sup>21</sup>    | Yogurt (all types)                                                                                                                                             |
| Alonso et al., 2009 – ARIC <sup>22</sup>                 | Not specified                                                                                                                                                  |
| Engberink et al., 2009 – MORGEN <sup>23</sup>            |                                                                                                                                                                |
| Kim et al., Brit J Nutr, 2017 – KoGES <sup>24</sup>      |                                                                                                                                                                |
| Steffen et al., 2005 – CARDIA <sup>17</sup>              |                                                                                                                                                                |
| Wang et al., 2015 – FHS <sup>25</sup>                    |                                                                                                                                                                |
| Dairy desserts                                           |                                                                                                                                                                |
| Steffen et al., 2005 – CARDIA <sup>17</sup>              | Dairy desserts (not specified)                                                                                                                                 |
| Wang et al., 2008 – WHS <sup>20</sup>                    | Low-fat sherbet                                                                                                                                                |
| Alonso et al., 2009 – ARIC <sup>22</sup>                 | Ice cream                                                                                                                                                      |
| 100% Fruit juice                                         |                                                                                                                                                                |
| Duffey et al., 2010 – CARDIA <sup>4</sup>                | Fruit juice (non-sweetened)                                                                                                                                    |
| Auerbach et al., 2017 – WHI <sup>13</sup>                | 100% fruit juice                                                                                                                                               |
| Fruit drinks                                             |                                                                                                                                                                |
| Mirmiran et al., 2015 – TLGS <sup>7</sup>                | Fruit juice – sugar-sweetened drinks and non-sweetened                                                                                                         |
| Sweet snacks                                             |                                                                                                                                                                |
| Asghari et al., 2016 – TLGS <sup>26</sup>                | Candies, chocolates, cookies, cakes, biscuits, confectionery, caramels, and traditional Iranian confectioneries, such as gaz, sohan, noghl, halva, Yazdi cakes |









**Table S4. Newcastle-Ottawa Scale (NOS) for Assessing the Quality of Cohort Studies.**

| <b>Study</b>                                     | <b>Selection*</b> | <b>Outcome †</b> | <b>Comparability ‡</b> | <b>Total §</b> |
|--------------------------------------------------|-------------------|------------------|------------------------|----------------|
| Alonso et al., 2009 <sup>22</sup>                | 4                 | 3                | 2                      | 9              |
| Asghari et al., 2016 <sup>26</sup>               | 4                 | 3                | 1                      | 8              |
| Auberbach et al., 2017 <sup>13</sup>             | 3                 | 1                | 2                      | 6              |
| Barrio-Lopez et al., 2013 <sup>1</sup>           | 3                 | 3                | 2                      | 7              |
| Borgi et al., 2016 <sup>11</sup>                 | 3                 | 2                | 2                      | 6              |
| Buenda et al., 2018 <sup>21</sup>                | 2                 | 2                | 1                      | 5              |
| Cohen et al., 2012 <sup>2</sup>                  | 3                 | 2                | 2                      | 6              |
| Dhingra et al., 2007 <sup>3</sup>                | 4                 | 2                | 1                      | 6              |
| Duffey et al., 2010 <sup>4</sup>                 | 4                 | 1                | 2                      | 7              |
| Engberink et al., 2009 <sup>23</sup>             | 3                 | 2                | 1                      | 6              |
| Kang et al., 2017 <sup>5</sup>                   | 4                 | 2                | 2                      | 8              |
| Kim et al., Br J Nutr, 2017 <sup>24</sup>        | 4                 | 2                | 2                      | 8              |
| Kim et al., J Acad Nutr Diet, 2017 <sup>12</sup> | 4                 | 2                | 2                      | 8              |
| Koochakpoor et al., 2018 <sup>14</sup>           | 4                 | 3                | 1                      | 8              |
| Kwak et al., 2018 <sup>6</sup>                   | 4                 | 2                | 2                      | 8              |
| Mirmiran et al., 2015 <sup>7</sup>               | 4                 | 3                | 1                      | 8              |
| Nun˘ez-Cordoba et al., 2009 <sup>15</sup>        | 3                 | 3                | 2                      | 7              |
| Psaltopoulou et al., 2004 <sup>16</sup>          | 3                 | 2                | 1                      | 6              |
| Sayon-Orea et al., 2015 <sup>8</sup>             | 3                 | 2                | 2                      | 6              |
| Steffen et al., 2005 <sup>17</sup>               | 4                 | 2                | 1                      | 7              |
| Tsubota-Utsugi et al., 2011 <sup>18</sup>        | 4                 | 2                | 2                      | 7              |
| Wang et al., 2008 <sup>20</sup>                  | 3                 | 2                | 2                      | 6              |
| Wang et al., 2012 <sup>19</sup>                  | 3                 | 1                | 2                      | 5              |
| Wang et al., 2015 <sup>9</sup>                   | 3                 | 2                | 1                      | 6              |
| Weng et al., 2013 <sup>9</sup>                   | 4                 | 3                | 1                      | 8              |
| Winkelmayer et al., 2005 <sup>10</sup>           | 3                 | 3                | 1                      | 6              |

\* Maximum 4 points awarded for cohort representativeness, selection of non-exposed cohort, exposure assessment and demonstration outcome not present at baseline.

† Maximum 3 points awarded for follow-up length, adequacy of follow-up and outcome assessment.

‡ Maximum 2 points awarding for controlling for the pre-specified primary confounding variable (age) and ≥ 6 of the secondary confounding variables (sex, any marker of adiposity, smoking, energy intake, physical activity, diabetes/dysglycemia, alcohol intake, sodium intake).

§ A maximum of 9 points could be awarded.

**Table S5. Sensitivity analysis with systematic removal of each study.**

| Removal of:                                     | Participants<br>N | Cases<br>N  | Risk Ratio for Incident Hypertension |                     |               | Heterogeneity  |             |
|-------------------------------------------------|-------------------|-------------|--------------------------------------|---------------------|---------------|----------------|-------------|
|                                                 |                   |             | RR                                   | 95% CI              | p-value       | I <sup>2</sup> | p-value     |
| <b>SSBs</b>                                     |                   |             |                                      |                     |               |                |             |
| <i>All included:</i>                            | 427,630           | 120,553     | 1.17                                 | [1.11, 1.23]        | <0.00001      | 66%            | 0.0004      |
| Barrio-Lopez, Brit J Nutr, 2013 - SUN           | 8157              | 1464        | 1.14                                 | [1.09, 1.20]        | <0.00001      | 58%            | 0.006       |
| Cohen, J Gen Intern Med, 2012 - HPFS            | 37360             | 13439       | 1.19                                 | [1.12, 1.26]        | <0.00001      | 66%            | 0.0006      |
| Cohen, J Gen Intern Med, 2012 - NHS             | 88540             | 42022       | 1.19                                 | [1.11, 1.28]        | <0.00001      | 66%            | 0.0002      |
| Cohen, J Gen Intern Med, 2012 - NHSII           | 97991             | 21873       | 1.18                                 | [1.10, 1.25]        | <0.00001      | 67%            | 0.0005      |
| Dhingra, Circulation, 2007 - FOC                | 2803              | 1377        | 1.17                                 | [1.11, 1.24]        | <0.00001      | 69%            | 0.0002      |
| Duffrey, Am J Clin Nutr, 2010 - CARDIA          | 2639              | 609         | 1.19                                 | [1.12, 1.27]        | <0.00001      | 63%            | 0.002       |
| Kang, Brit J Nutr, 2017 - KoGES                 | 4591              | 1309        | 1.15                                 | [1.09, 1.21]        | <0.00001      | 64%            | 0.001       |
| Kwak, Eur J Nutr, 2018 - KoGES                  | 5775              | 1175        | 1.17                                 | [1.10, 1.24]        | <0.00001      | 69%            | 0.0003      |
| Mirmiran, Nutr Metab, 2015 - TLGS               | 424               | 47          | 1.16                                 | [1.10, 1.22]        | <0.00001      | 65%            | 0.0008      |
| Sayon-Orea, Clin Nutr, 2015 - SUN               | 13843             | 1308        | 1.16                                 | [1.10, 1.22]        | <0.00001      | 67%            | 0.0005      |
| Weng, Nutrients, 2013 - ARIC                    | 9913              | 2853        | 1.18                                 | [1.12, 1.25]        | <0.00001      | 67%            | 0.0004      |
| Winkelmayer, JAMA, 2005 - NHS                   | 61091             | 19541       | 1.16                                 | [1.10, 1.23]        | <0.00001      | 68%            | 0.0003      |
| Winkelmayer, JAMA, 2005 - NHSII                 | 94503             | 13536       | 1.16                                 | [1.10, 1.23]        | <0.00001      | 68%            | 0.0003      |
| <b>Fruit</b>                                    |                   |             |                                      |                     |               |                |             |
| <i>All included:</i>                            | 281,120           | 148,928     | 0.81                                 | [0.73, 0.89]        | <0.0001       | 88%            | <0.00001    |
| Auerbach, Prev med, 2017 - WHI                  | 80539             | 46202       | 0.77                                 | [0.68, 0.87]        | <0.0001       | 87%            | <0.00001    |
| Borgi, Hypertension, 2016 - HPFS                | 20010             | 16752       | 0.79                                 | [0.70, 0.89]        | <0.0001       | 89%            | <0.00001    |
| Borgi, Hypertension, 2016 - NHS                 | 39164             | 35375       | 0.78                                 | [0.69, 0.88]        | <0.0001       | 89%            | <0.00001    |
| Borgi, Hypertension, 2016 - NHS II              | 63885             | 25246       | 0.79                                 | [0.71, 0.88]        | <0.0001       | 89%            | <0.00001    |
| Kim, J Acad Nutr Diet, 2017 - KoGES (men)       | 2085              | 606         | 0.84                                 | [0.77, 0.93]        | 0.0005        | 86%            | <0.00001    |
| Kim, J Acad Nutr Diet, 2017 - KoGES (women)     | 2172              | 552         | 0.87                                 | [0.80, 0.94]        | 0.0009        | 80%            | <0.00001    |
| Koochakpoor, Nutr Res, 2018 - TLGS              | 1284              | 640         | 0.80                                 | [0.72, 0.89]        | <0.0001       | 89%            | <0.00001    |
| Nun~ez-Cordoba, Eur J Clin Nutr, 2009 - SUN     | 8594              | 426         | 0.80                                 | [0.72, 0.89]        | <0.0001       | 89%            | <0.00001    |
| Psaltopoulou, Am J Clin Nutr, 2004 - EPIC       | 20343             | 5424        | 0.82                                 | [0.74, 0.91]        | 0.0002        | 88%            | <0.00001    |
| Steffen, Am J Clin Nutr, 2005 - CARDIA          | 4304              | 997         | 0.81                                 | [0.73, 0.90]        | 0.0001        | 88%            | <0.00001    |
| Tsubota-Utsugi, J Hum Hypertens, 2011 - Ohasama | 745               | 222         | 0.82                                 | [0.74, 0.91]        | 0.0001        | 88%            | <0.00001    |
| Wang, Am J Hypertens, 2012 - WHS                | 28082             | 13633       | 0.78                                 | [0.69, 0.88]        | <0.0001       | 89%            | <0.00001    |
| Weng, Nutrients, 2013 - ARIC                    | 9913              | 2853        | 0.78                                 | [0.70, 0.87]        | <0.00001      | 89%            | <0.00001    |
| <b>Yogurt</b>                                   |                   |             |                                      |                     |               |                |             |
| <i>All included:</i>                            | 235705            | 97783       | 0.96                                 | [0.86, 0.96]        | 0.0007        | 54%            | 0.03        |
| Alonso, Eur J Clin Nutr, 2009 - ARIC            | 8208              | 2399        | 0.90                                 | [0.85, 0.95]        | 0.0002        | 54%            | 0.03        |
| Buendia, J Hypertens, 2018 - HPFS               | 30512             | 14166       | 0.90                                 | [0.85, 0.95]        | 0.0002        | 53%            | 0.04        |
| Buendia, J Hypertens, 2018 - NHS                | 69298             | 41934       | 0.92                                 | [0.86, 0.98]        | 0.007         | 53%            | 0.04        |
| Buendia, J Hypertens, 2018 - NHSII              | 84368             | 26282       | 0.91                                 | [0.85, 0.97]        | 0.006         | 59%            | 0.02        |
| Engberink, J Nutr, 2009 - MORGEN                | 3454              | 713         | 0.91                                 | [0.86, 0.97]        | 0.002         | 58%            | 0.02        |
| <b>Kim, Brit J Nutr, 2017 - KoGES</b>           | <b>4335</b>       | <b>1556</b> | <b>0.92</b>                          | <b>[0.88, 0.96]</b> | <b>0.0003</b> | <b>30%</b>     | <b>0.19</b> |
| Steffen, Am J Clin Nutr, 2005 - CARDIA          | 4304              | 997         | 0.91                                 | [0.86, 0.97]        | 0.002         | 60%            | 0.02        |
| Wang, Brit J Nutr, 2015 - FHS                   | 28886             | 8710        | 0.90                                 | [0.84, 0.96]        | 0.002         | 53%            | 0.04        |
| Wang, Hypertension, 2008 - WHS                  | 2340              | 1026        | 0.90                                 | [0.85, 0.96]        | 0.0008        | 58%            | 0.02        |

Each study was removed independently and the pooled estimate recalculated. The red and blue lines represent the original pooled risk estimate with all studies included. Inter-study heterogeneity was tested using the Cochran Q statistic (Chi<sup>2</sup>) at a significance level of p<0.10, and quantified by the I<sup>2</sup> statistic. An I<sup>2</sup> value ≥ 50% is considered to indicate substantial heterogeneity. All results are presented as Relative Risks (RR) with 95% Confidence Intervals.



**Table S6. GRADE assessment.**

| No. of comparisons                                                                    | Design                | Quality assessment |               |                 |              |                  |                           | Study event rates (%) | Effect<br>Relative Risk<br>[95% CI] | Quality<br>Importance              |
|---------------------------------------------------------------------------------------|-----------------------|--------------------|---------------|-----------------|--------------|------------------|---------------------------|-----------------------|-------------------------------------|------------------------------------|
|                                                                                       |                       | Risk of bias       | Inconsistency | Indirectness    | Imprecision  | Publication bias | Other considerations      |                       |                                     |                                    |
| <b>SSBs intake on incident hypertension (follow-up median 10.0 years)</b>             |                       |                    |               |                 |              |                  |                           |                       |                                     |                                    |
| 13 <sup>24, 26-29, 32, 38, 44-46</sup>                                                | Observational studies | No serious         | Serious*      | No serious      | No serious   | Detected†        | Dose-response gradient‡   | 28%                   | RR 1.17<br>[1.11, 1.23]             | ⊕⊕⊕⊖<br>Low *, †, ‡                |
| <b>Fruit intake on incident hypertension (follow-up median 9.0 years)</b>             |                       |                    |               |                 |              |                  |                           |                       |                                     |                                    |
| 13 <sup>25, 30, 31, 33, 34, 36, 40, 46, 48, 49</sup>                                  | Observational studies | No serious         | Serious§      | No serious      | No serious   | Detected         | Dose-response gradient#   | 53%                   | RR 0.81<br>[0.73, 0.89]             | ⊕⊕⊕⊖<br>Low §,   , #               |
| <b>Yogurt intake on incident hypertension (follow-up median 14.6 years)</b>           |                       |                    |               |                 |              |                  |                           |                       |                                     |                                    |
| 9 <sup>33, 35, 37, 41-43, 47</sup>                                                    | Observational studies | No serious         | Serious**     | No serious      | Serious††    | Not detected‡‡   | Dose-response gradient§§  | 41%                   | RR 0.91<br>[0.86, 0.96]             | ⊕⊕⊕⊖<br>Low **, ††, ‡‡, §§         |
| <b>Dairy desserts intake on incident hypertension (follow-up median 10.0 years)</b>   |                       |                    |               |                 |              |                  |                           |                       |                                     |                                    |
| 3 <sup>33, 35, 42</sup>                                                               | Observational studies | No serious         | No serious    | No serious      | Serious††    | Not detected‡‡   | None                      | 29%                   | RR 0.85<br>[0.76, 0.95]             | ⊕⊕⊕⊖<br>Very low ††, ‡‡            |
| <b>100% Fruit juice intake on incident hypertension (follow-up median 13.9 years)</b> |                       |                    |               |                 |              |                  |                           |                       |                                     |                                    |
| 2 <sup>28, 40</sup>                                                                   | Observational studies | No serious         | Serious       | No serious      | No serious## | Not detected‡‡   | Dose-response gradient*** | 56%                   | RR 0.95<br>[0.85, 1.07]             | ⊕⊕⊕⊖<br>Low ‡‡,    , ##, ***       |
| <b>Fruit drinks intake on incident hypertension (follow-up 3.6 years)</b>             |                       |                    |               |                 |              |                  |                           |                       |                                     |                                    |
| 1 <sup>29</sup>                                                                       | Observational study   | No serious         | No serious    | Serious†††, ‡‡‡ | Serious§§§   | Not detected‡‡   | None                      | 11%                   | RR 1.27<br>[0.43, 3.75]             | ⊕⊕⊕⊖<br>Very low ‡‡, †††, ‡‡‡, §§§ |
| <b>Sweet snacks intake on incident hypertension (follow-up 3.6 years)</b>             |                       |                    |               |                 |              |                  |                           |                       |                                     |                                    |
| 1 <sup>39</sup>                                                                       | Observational study   | No serious         | No serious    | Serious†††, ‡‡‡ | Serious      | Not detected‡‡   | None                      | 11%                   | RR 2.00<br>[0.84, 4.76]             | ⊕⊕⊕⊖<br>Very low ‡‡, ***, †††,     |

\* Downgrade for serious inconsistency, as there was evidence of substantial inter-study heterogeneity ( $I^2=66\%$ ,  $p=0.0004$ )

† There was evidence of funnel plot asymmetry via visual inspection and both the Egger ( $p=0.02$ ) and Begg test were significant ( $p=0.04$ ). Adjustment for funnel plot asymmetry by the recalculation of the pooled estimate by inputting missing studies using the Duvall and Tweedie trim and fill method did not alter the significance of the relationship, with only limited attenuation of the summary estimate (RR=1.12 [95% CI, 1.05-1.19]).

‡ Upgrade for dose-response gradient, as there was a significant harmful dose-response relationship between SSBs intake and hypertension with evidence for non-linearity ( $p=0.02$ ).

§ Downgrade for serious inconsistency, as there was evidence of substantial inter-study heterogeneity ( $I^2=88\%$ ,  $p<0.00001$ ).

|| There was evidence of funnel plot asymmetry as the Begg test was significant ( $p=0.09$ ), although the Egger test was not significant ( $p=0.70$ ). The Duvall and Tweedie trim and fill method did not perform any trimming and the pooled estimate did not change.

# Upgrade for dose-response gradient, as there was a significant protective and linear dose-response relationship between fruit intake and hypertension.

\*\* Downgrade for serious inconsistency, as there was evidence of substantial inter-study heterogeneity ( $I^2=54\%$ ,  $p=0.03$ )

†† Downgrade for serious imprecision, as the upper CI bound crosses the clinically important protection threshold of RR=0.9.

‡‡ Bias cannot be excluded since we were unable to test for funnel plot asymmetry due to lack of power (<10 cohorts included in the analysis).

§§ Upgrade for dose-response gradient, as there was a significant protective dose-response relationship between yogurt intake and hypertension with evidence for non-linearity ( $p=0.02$ ).

||| Downgrade for serious inconsistency, as there was evidence of substantial inter-study heterogeneity ( $I^2=85\%$ ,  $p=0.01$ ).

## Although pairwise meta-analysis showed serious imprecision, this imprecision was explained by non-linear dose-response analysis.

\*\*\* Upgrade for dose-response gradient, as there was a significant U-shaped dose-response relationship between 100% fruit juice intake and hypertension (P-value for non-linearity=0.001).

††† Downgrade for serious indirectness due to limited number of cohort comparisons in specific groups which may not be generalizable to the general population.

‡‡‡ Downgrade for serious indirectness, as only number of cases of metabolic syndrome was reported.

§§§ Downgrade as the sample sizes were very small ( $n=424$ ) and the 95% CI were very large (0.43, 3.75) containing evidence of both clinically important protection (RR<0.9) and harm (RR>1.1).

|||| Downgrade as the sample size was very small ( $n=439$ ) and the 95% CI were very large (0.84, 4.76) containing evidence of both clinically important protection (RR<0.9) and harm (RR>1.1)

**Figure S1. Forest plot – Pairwise meta-analysis of SSBs intake and incident hypertension.**

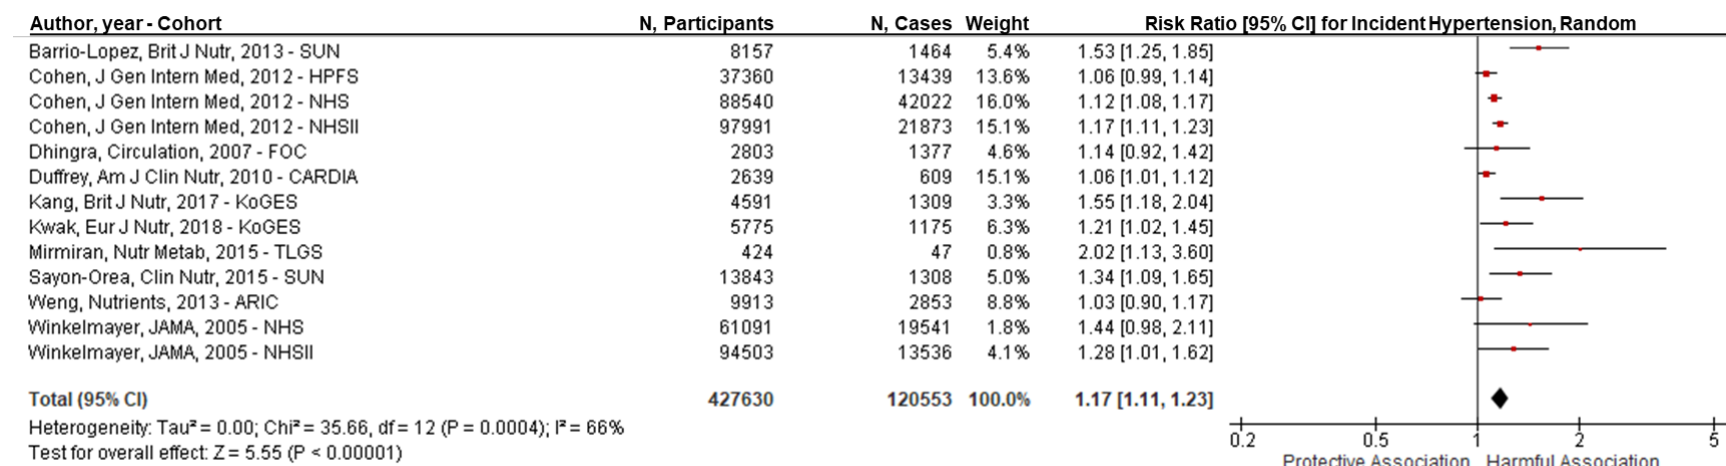

The black diamond represents the pooled risk estimate. Inter-study heterogeneity was tested using the Cochran Q statistic (Chi<sup>2</sup>) at a significance level of p<0.10, and quantified by the I<sup>2</sup> statistic. An I<sup>2</sup> value ≥ 50% is considered to indicate substantial heterogeneity. All results are presented as Relative Risks (RR) with 95% Confidence Intervals

**Figure S2. Forest plot – Pairwise meta-analysis of fruit intake and incident hypertension.**

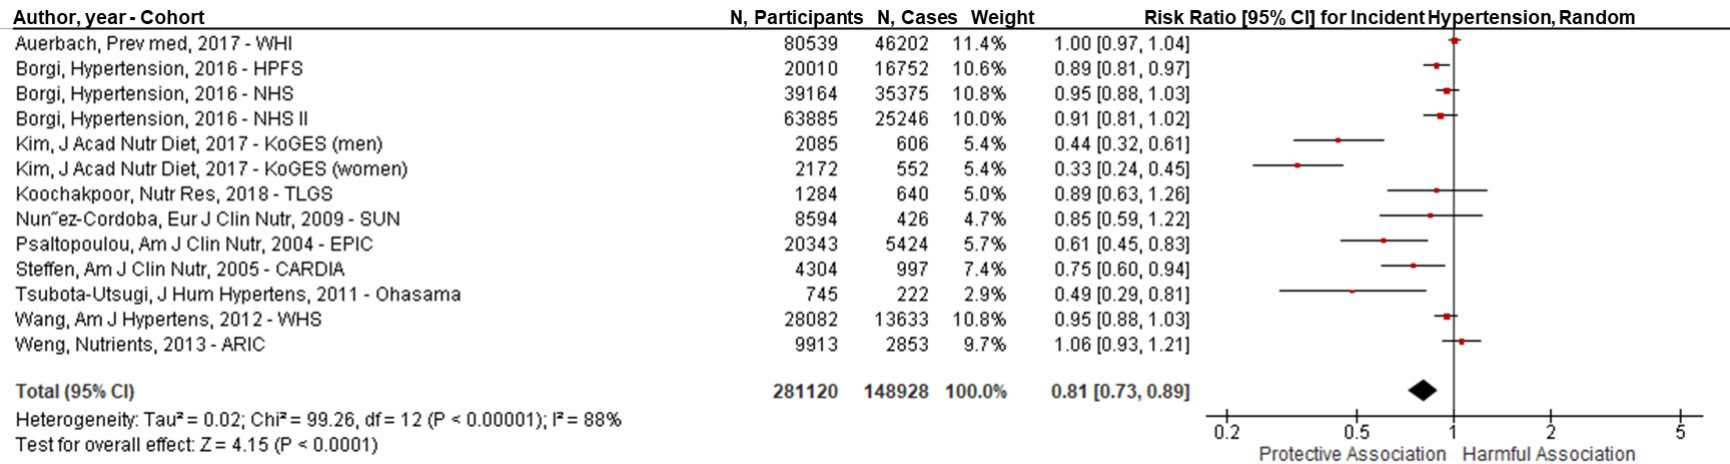

The black diamond represents the pooled risk estimate. Inter-study heterogeneity was tested using the Cochran Q statistic (Chi<sup>2</sup>) at a significance level of p<0.10, and quantified by the I<sup>2</sup> statistic. An I<sup>2</sup> value ≥ 50% is considered to indicate substantial heterogeneity. All results are presented as Relative Risks (RR) with 95% Confidence Intervals. Mirmiran et al. only reported cases of metabolic syndrome.

**Figure S3. Forest plot – Pairwise meta-analysis of yogurt intake and incident hypertension.**

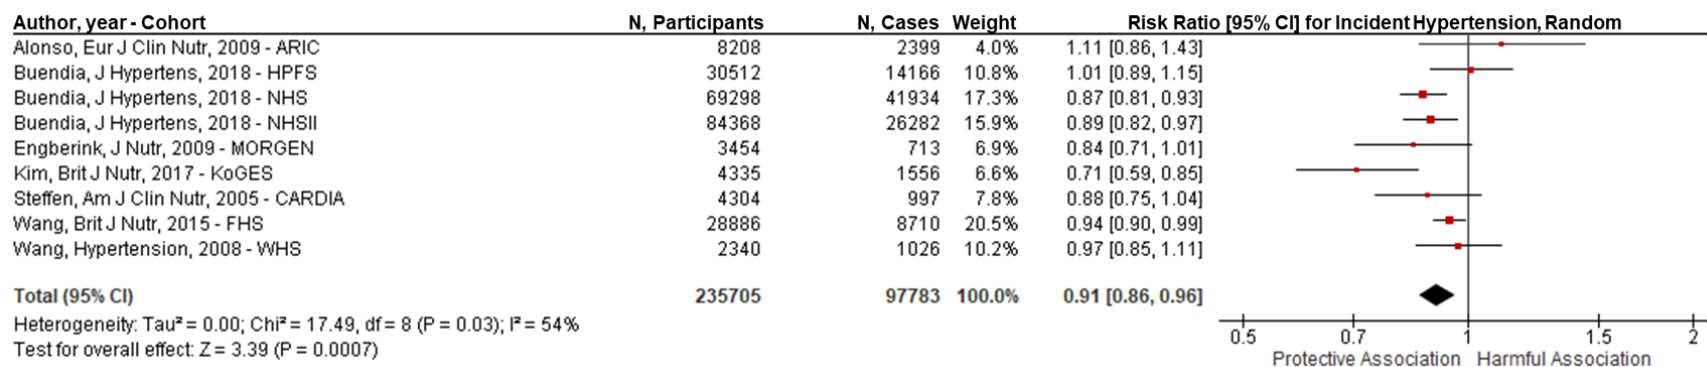

The black diamond represents the pooled risk estimate. Inter-study heterogeneity was tested using the Cochran Q statistic (Chi<sup>2</sup>) at a significance level of p<0.10, and quantified by the I<sup>2</sup> statistic. An I<sup>2</sup> value ≥ 50% is considered to indicate substantial heterogeneity. All results are presented as Relative Risks (RR) with 95% Confidence Intervals.

**Figure S4. Forest plot – Pairwise meta-analysis of dairy desserts intake and incident hypertension.**

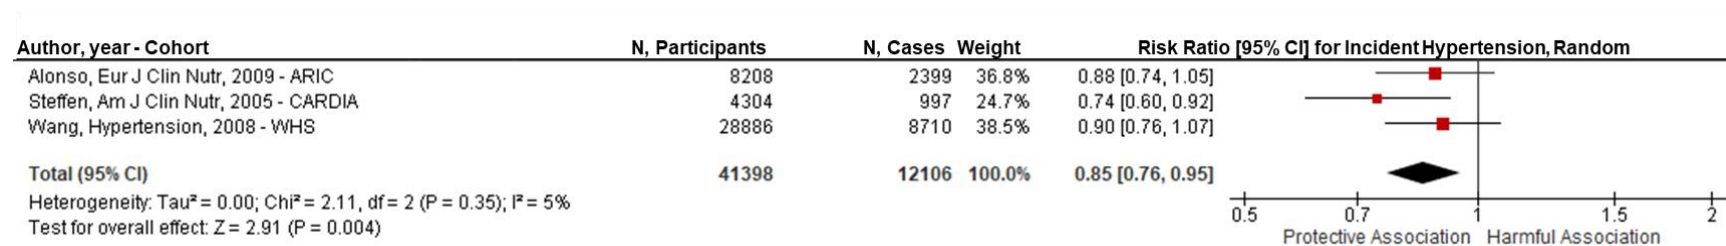

The black diamond represents the pooled risk estimate. Inter-study heterogeneity was tested using the Cochran Q statistic (Chi<sup>2</sup>) at a significance level of p<0.10, and quantified by the I<sup>2</sup> statistic. An I<sup>2</sup> value ≥ 50% is considered to indicate substantial heterogeneity. All results are presented as Relative Risks (RR) with 95% Confidence Intervals.

**Figure S5. Forest plot – Pairwise meta-analysis of 100% fruit juice intake and incident hypertension.**

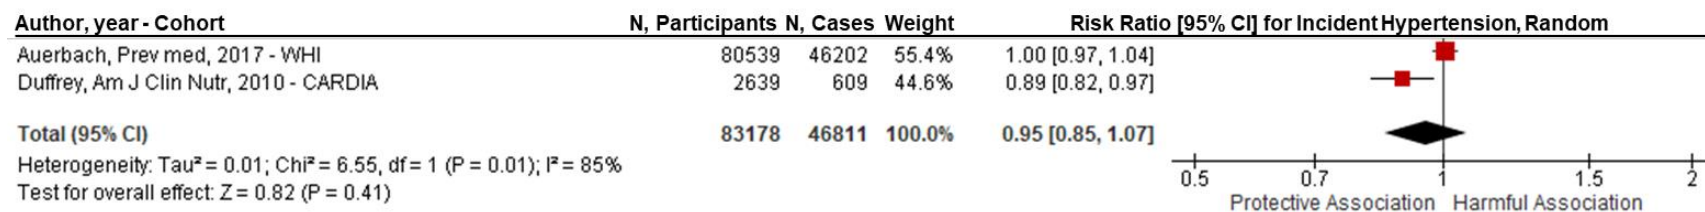

The black diamond represents the pooled risk estimate. Inter-study heterogeneity was tested using the Cochran Q statistic (Chi<sup>2</sup>) at a significance level of p<0.10, and quantified by the I<sup>2</sup> statistic. An I<sup>2</sup> value ≥ 50% is considered to indicate substantial heterogeneity. All results are presented as Relative Risks (RR) with 95% Confidence Intervals.

**Figure S6. Forest plot – Pairwise meta-analysis of fruit drinks intake and incident hypertension.**

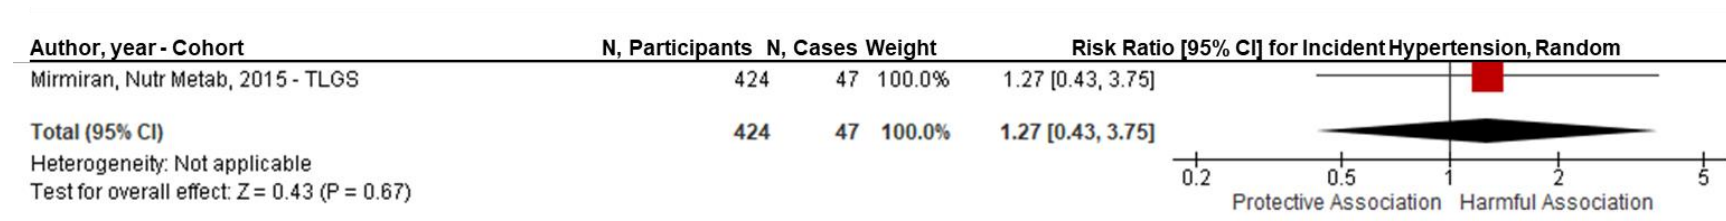

The black diamond represents the pooled risk estimate. Inter-study heterogeneity was tested using the Cochran Q statistic ( $\chi^2$ ) at a significance level of  $p < 0.10$ , and quantified by the  $I^2$  statistic. An  $I^2$  value  $\geq 50\%$  is considered to indicate substantial heterogeneity. All results are presented as Relative Risks (RR) with 95% Confidence Intervals. \*Study only reported cases of metabolic syndrome.

**Figure S7. Forest plot – Pairwise meta-analysis of sweet Snacks intake and incident hypertension.**

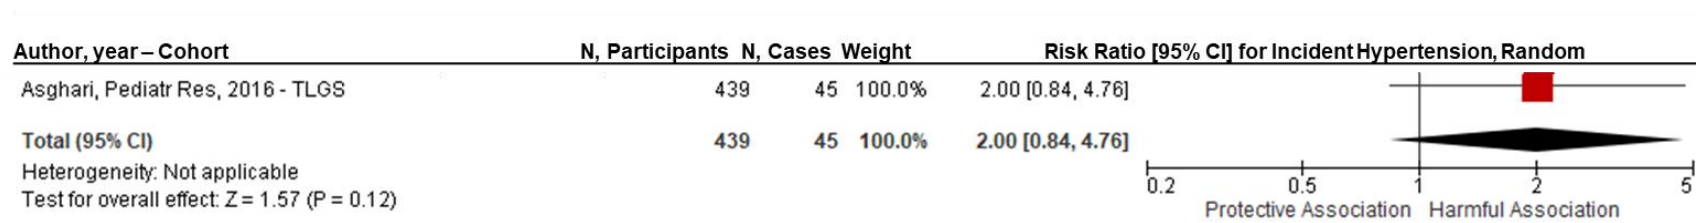

The black diamond represents the pooled risk estimate. Inter-study heterogeneity was tested using the Cochran Q statistic ( $\chi^2$ ) at a significance level of  $p < 0.10$ , and quantified by the  $I^2$  statistic. An  $I^2$  value  $\geq 50\%$  is considered to indicate substantial heterogeneity. All results are presented as Relative Risks (RR) with 95% Confidence Intervals. \*Study only reported cases of metabolic syndrome.



**Figure S8. Dose-response relation between sources of fructose-containing sugars and incident hypertension with study-specific data points.**

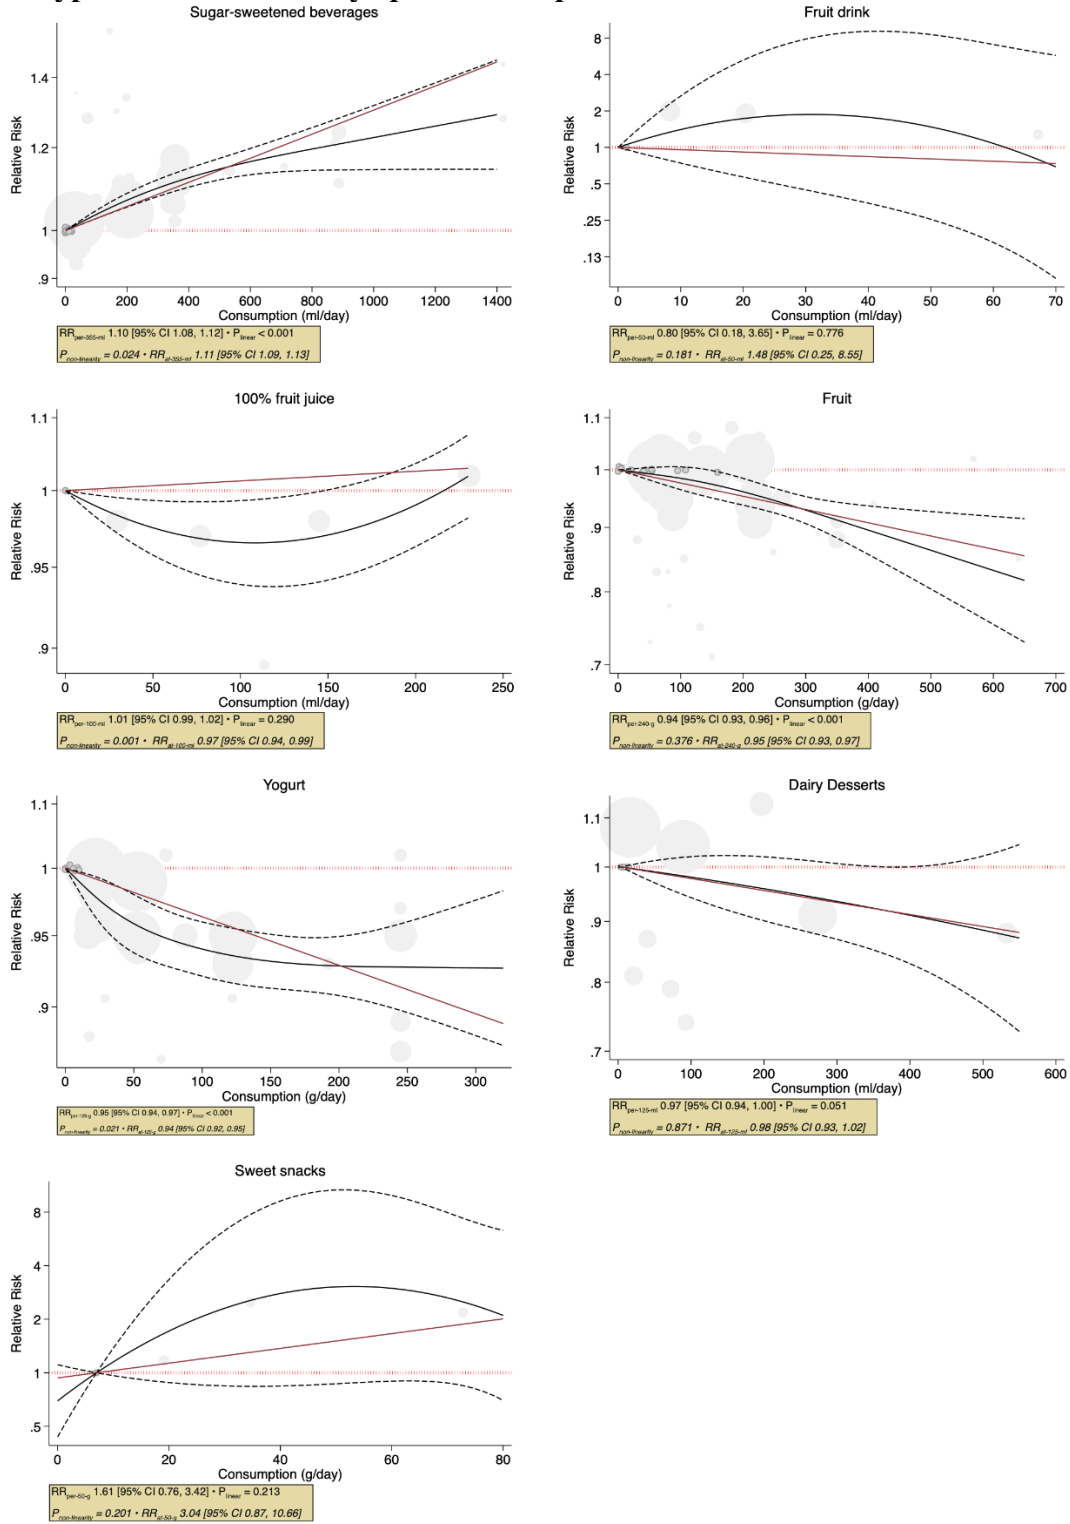

Dose-response relationship between intake of SSBs, fruit, 100% fruit juice, yogurt, fruit drink, dairy desserts, and sweet snacks with risk of hypertension. Red line represents the linear and black lines represent the non-linear models, respectively. Dotted lines represent 95% confidence intervals of the non-linear model. The light gray circles represent the relative risk-point estimates for the different doses from each study; the size of the circle is related to inverse of the variance. The smaller gray circles with dark gray outline represent the baseline dose category for each separate study; random-noise has been added in the graphic display for these baseline circles to show them separately.

**Figure S9. Subgroup analyses of SSBs intake and incident hypertension.**

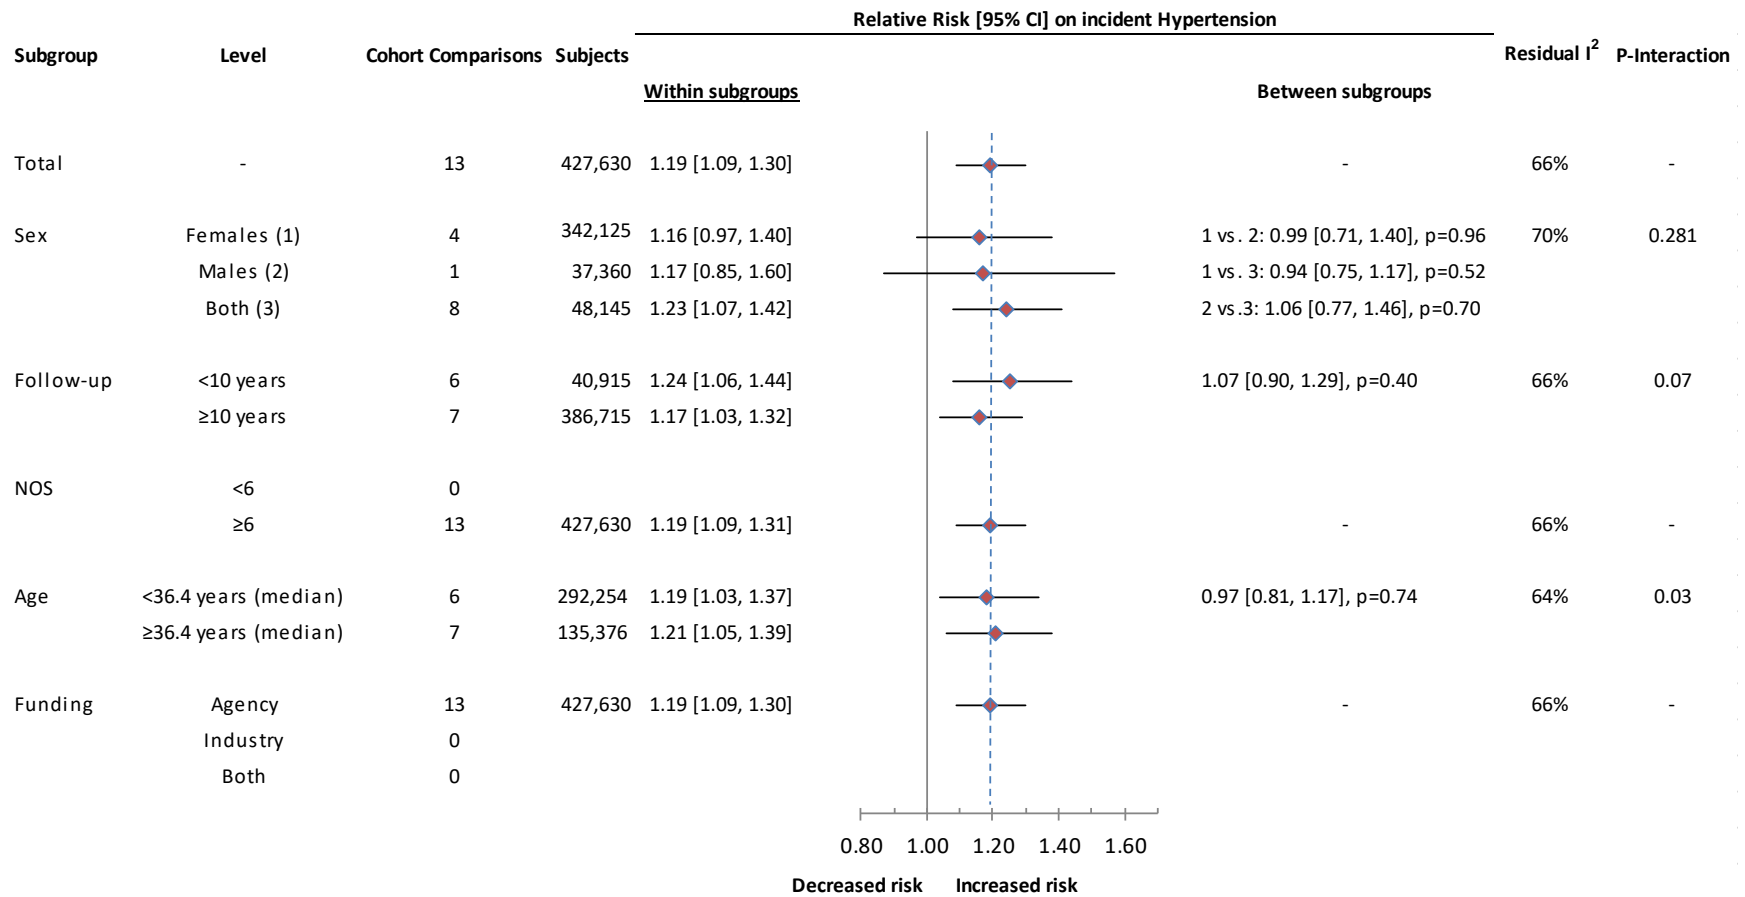

RR, relative risk; NOS, Newcastle-Ottawa Scale. Point estimates for each subgroup level (diamonds) are the pooled effect estimates. The dashed line represents the pooled effect estimate for the overall (total) analysis. The residual I<sup>2</sup> value indicates the inter-study heterogeneity unexplained by the subgroup.

**Figure S10. Subgroup analyses of fruit intake and incident hypertension.**

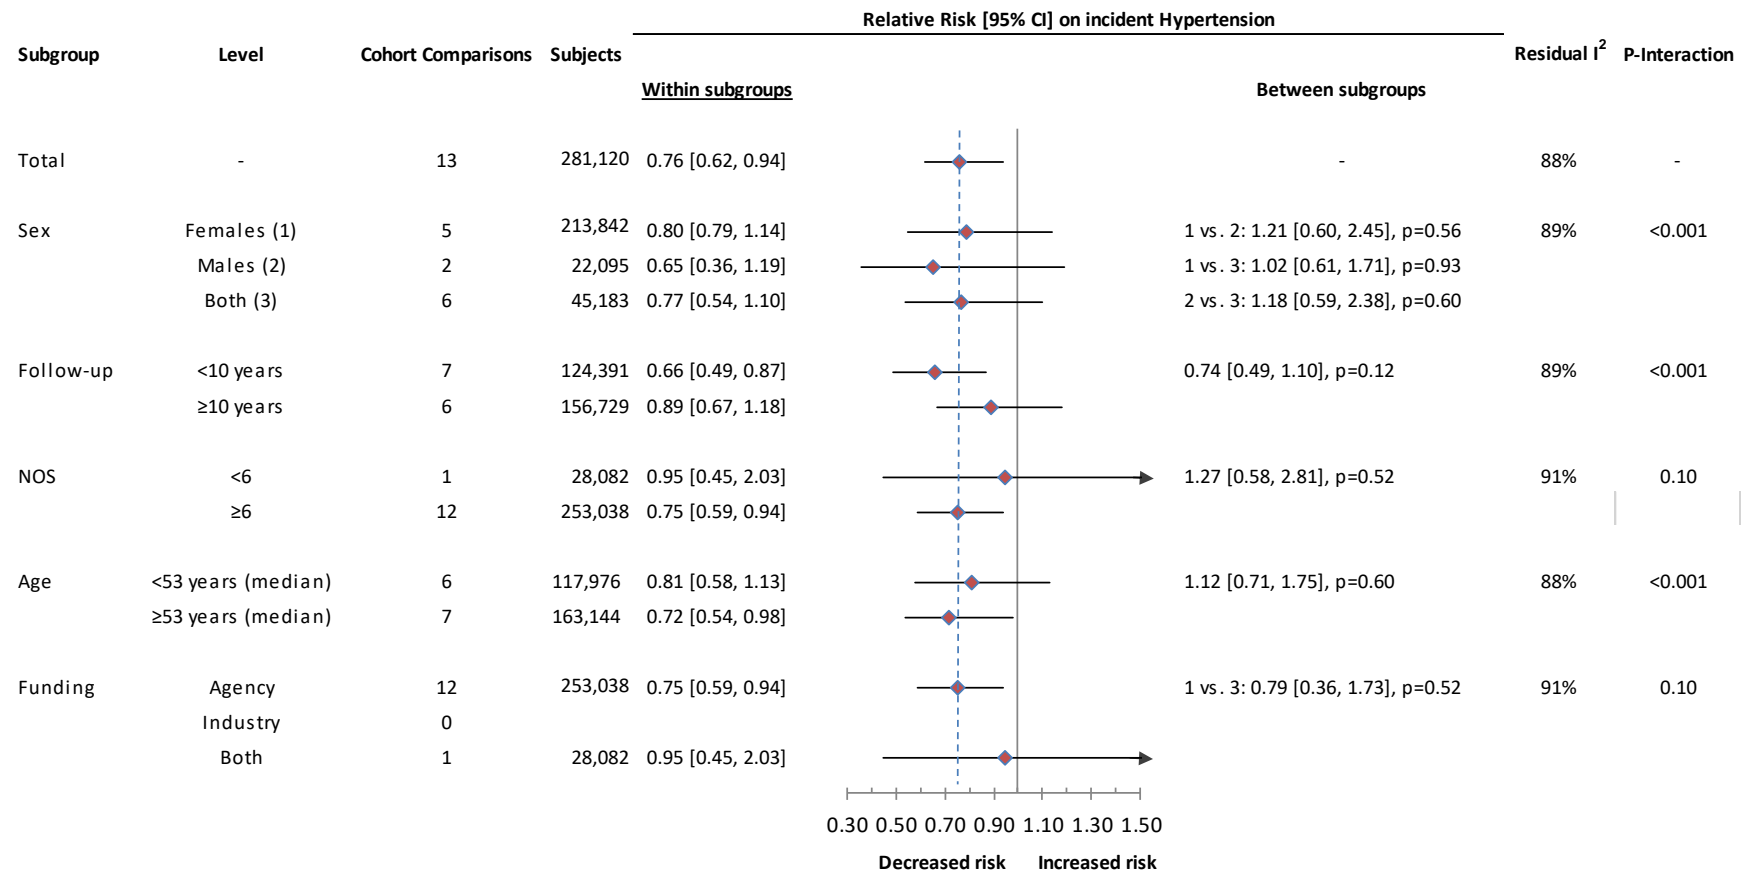

RR, relative risk; NOS, Newcastle-Ottawa Scale. Point estimates for each subgroup level (diamonds) are the pooled effect estimates. The dashed line represents the pooled effect estimate for the overall (total) analysis. The residual I<sup>2</sup> value indicates the inter-study heterogeneity unexplained by the subgroup.

**Figure S11. Funnel plot of natural logarithm relative risk (RR) for incident hypertension comparing the highest and lowest quantiles of SSBs intake.**

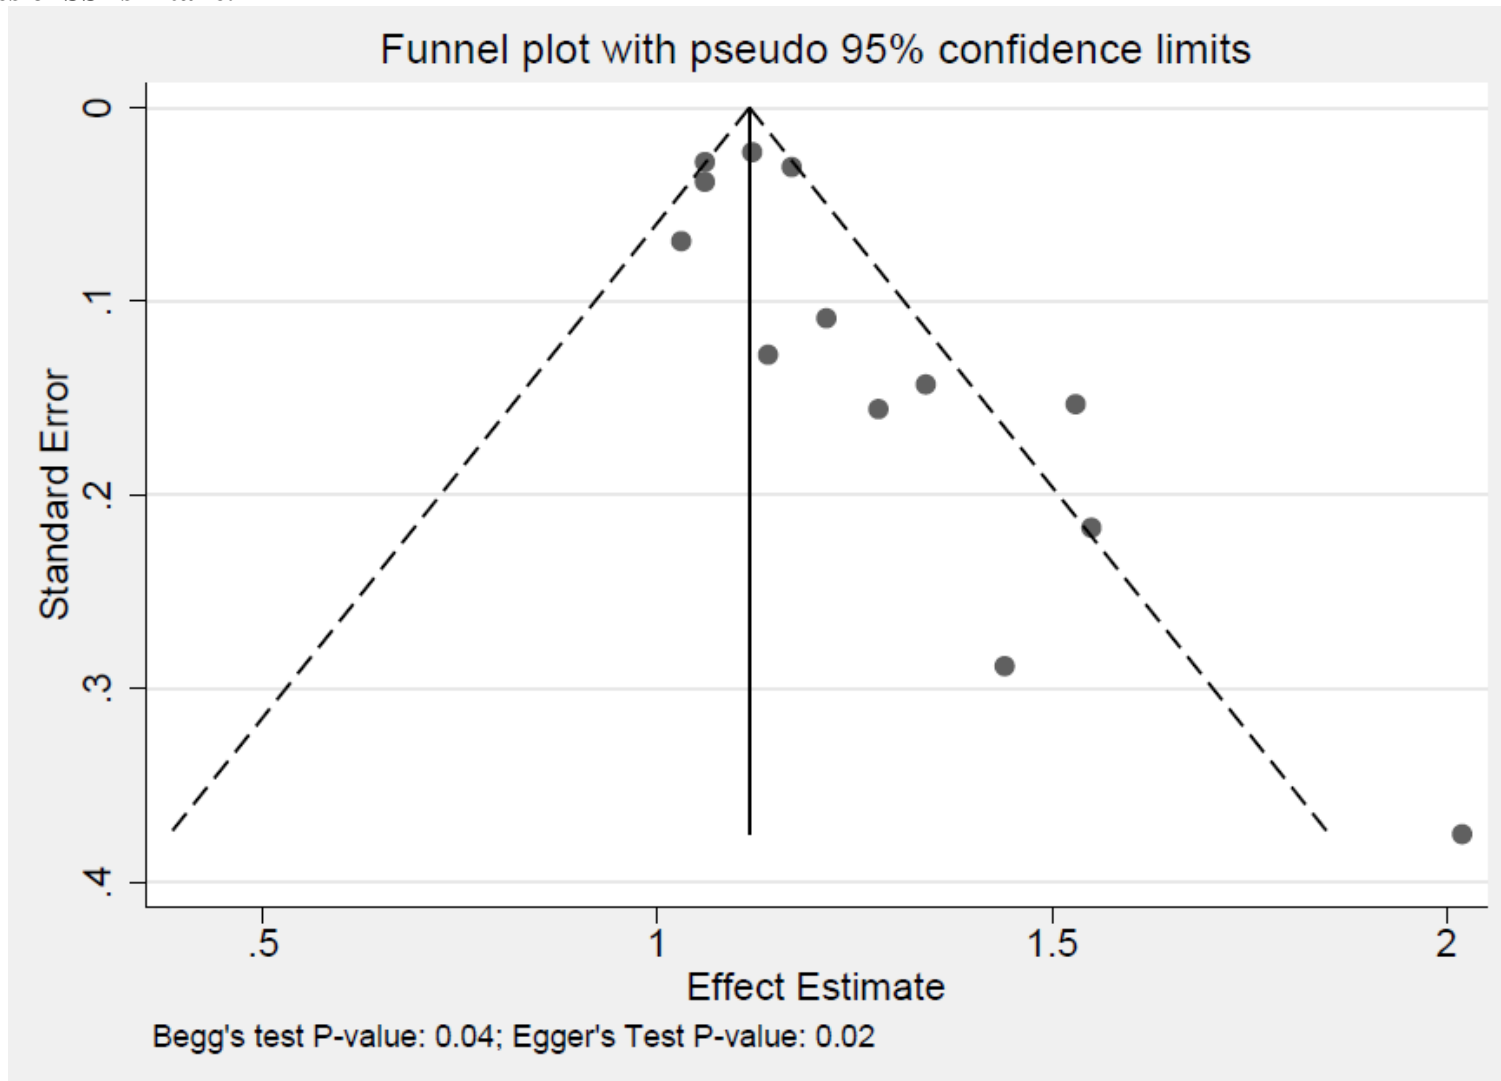

The vertical line represents the pooled effect estimate expressed as natural logarithm RR. Dashed lines represent pseudo-95% confidence intervals (CI). The circles represent risk effects for each cohort, and the horizontal lines represent standard errors of the effect estimate.

**Figure S12. Trim and fill funnel plot of natural logarithm relative risk (RR) for incident hypertension comparing the highest and lowest quantiles of SSBs intake.**

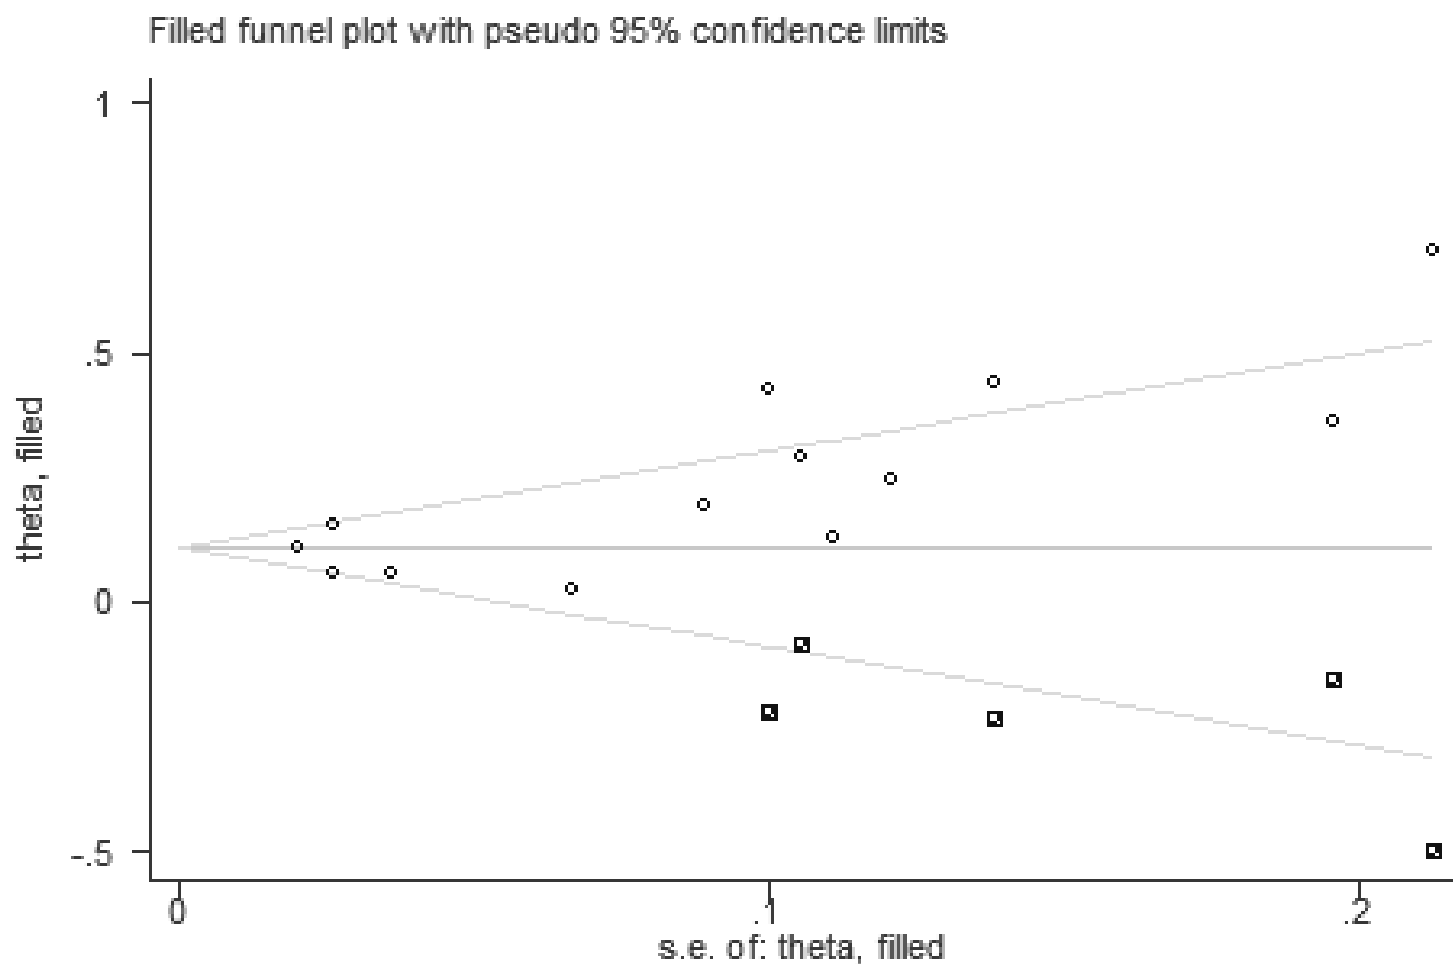

The horizontal line represents the pooled effect estimate expressed as natural logarithm RR. Diagonal lines represent pseudo-95% confidence intervals (CI). The circles represent risk effects for each cohort, and the squares represent filled data points. The horizontal axis represents standard errors of the effect estimate. Adjustment for funnel plot asymmetry by the recalculation of the pooled estimate by inputting missing cohort studies using the Duvall and Tweedie trim and fill method did not alter the significance of the relationship with only limited attenuation of the summary estimate (RR=1.12 [95% CI, 1.05, 1.19] versus original RR=1.17 [95% CI, 1.11, 1.23]).

**Figure S13. Funnel plot of natural logarithm relative risk (RR) for incident hypertension comparing the highest and lowest quantiles of fruit intake.**

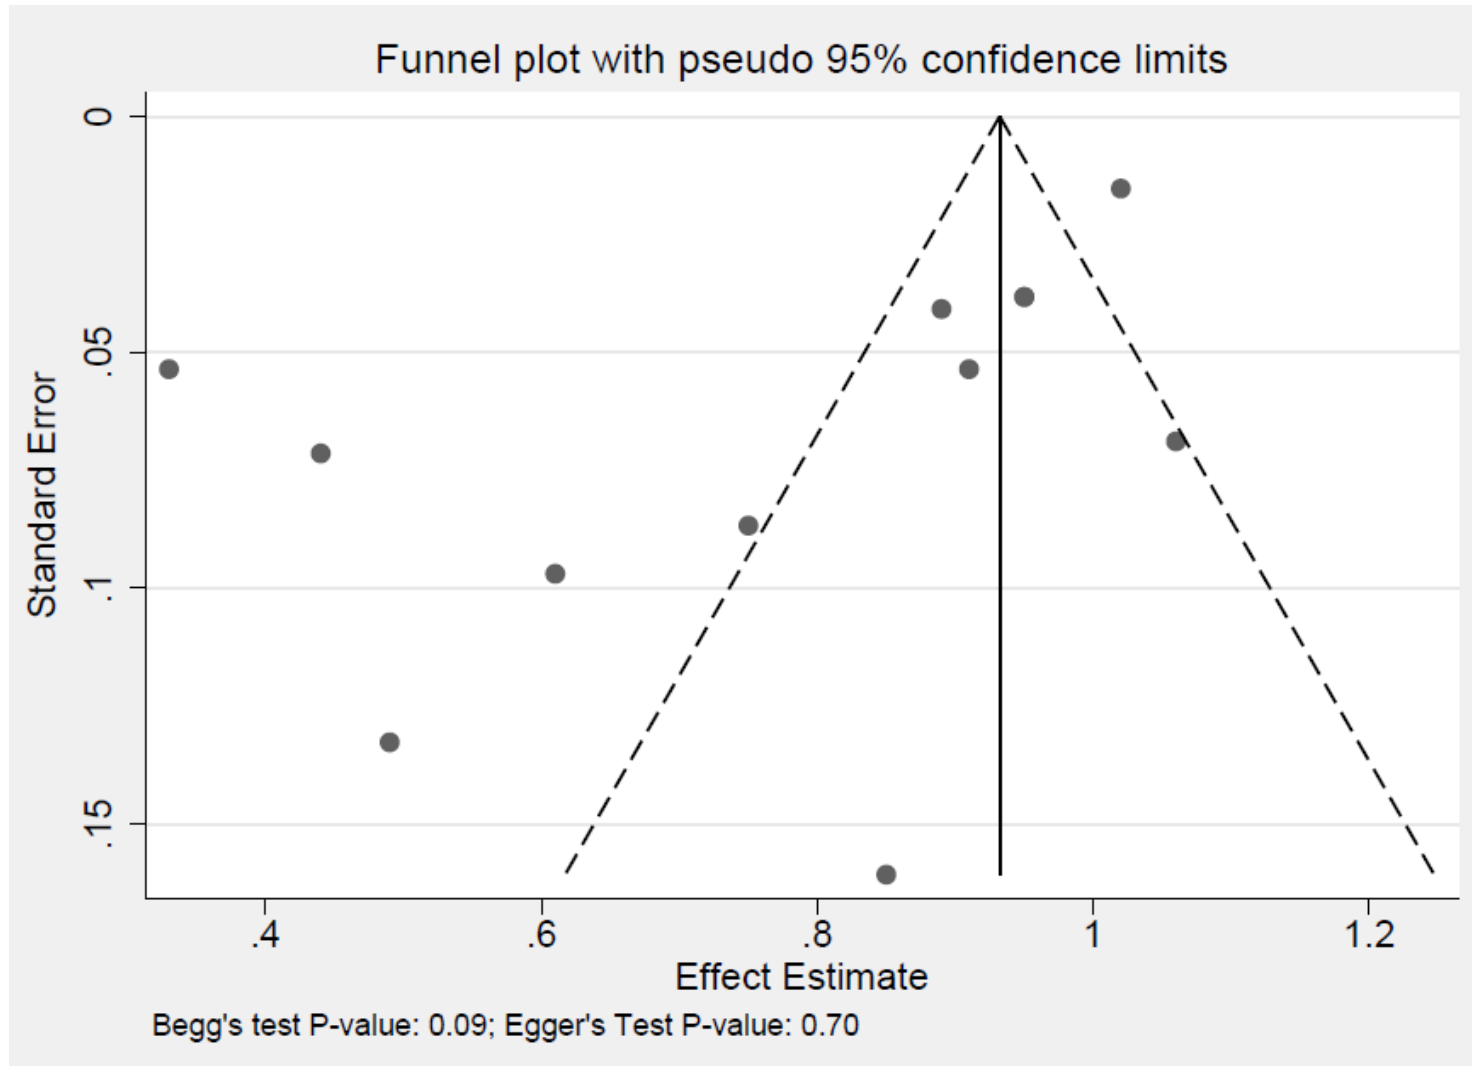

The vertical line represents the pooled effect estimate expressed as natural logarithm RR. Dashed lines represent pseudo-95% confidence intervals (CI). The circles represent risk effects for each cohort, and the horizontal lines represent standard errors of the effect estimate.

## Supplemental References:

1. Barrio-Lopez MT, Martinez-Gonzalez MA, Fernandez-Montero A, Beunza JJ, Zazpe I, Bes-Rastrollo M. Prospective study of changes in sugar-sweetened beverage consumption and the incidence of the metabolic syndrome and its components: The sun cohort. *British Journal of Nutrition*. 2013;110:1722-1731.
2. Cohen LC, G. Forman, J. Association of sweetened beverage intake with incident hypertension. *Journal of General Internal Medicine*. 2012;27:1127-1134.
3. Dhingra R, Sullivan L, Jacques PF, Wang TJ, Fox CS, Meigs JB, D'Agostino RB, Gaziano JM, Vasan RS. Soft drink consumption and risk of developing cardiometabolic risk factors and the metabolic syndrome in middle-aged adults in the community.[erratum appears in circulation. 2007 dec 4;116(23):E557]. *Circulation*. 2007;116:480-488.
4. Duffey KJG-L, P. Steffen, L. M. Jacobs Jr, D. R. Popkin, B. M. Drinking caloric beverages increases the risk of adverse cardiometabolic outcomes in the coronary artery risk development in young adults (cardia) study. *American Journal of Clinical Nutrition*. 2010;92:954-959.
5. Kang Y, Kim J. Soft drink consumption is associated with increased incidence of the metabolic syndrome only in women. *British Journal of Nutrition*. 2017;117:315-324.
6. Kwak JH, Jo G, Chung HK, Shin MJ. Association between sugar-sweetened beverage consumption and incident hypertension in Korean adults: A prospective study. *European Journal of Nutrition*. 2018;25:25.
7. Mirmiran PY, E. Asghari, G. Hosseinpour-Niazi, S. Azizi, F. Consumption of sugar sweetened beverage is associated with incidence of metabolic syndrome in Tehranian children and adolescents. *Nutrition and Metabolism*. 2015;12.
8. Sayon-Orea C, Martinez-Gonzalez MA, Gea A, Alonso A, Pimenta AM, Bes-Rastrollo M. Baseline consumption and changes in sugar-sweetened beverage consumption and the incidence of hypertension: The sun project. *Clinical Nutrition*. 2015;34:1133-1140.
9. Weng L-C, Steffen LM, Szklo M, Nettleton J, Chambless L, Folsom AR. A diet pattern with more dairy and nuts, but less meat is related to lower risk of developing hypertension in middle-aged adults: The atherosclerosis risk in communities (aric) study. *Nutrients*. 2013;5:1719-1733.
10. Winkelmayr WC, Stampfer MJ, Willett WC, Curhan GC. Habitual caffeine intake and the risk of hypertension in women. *Jama*. 2005;294:2330-2335.
11. Borgi L, Muraki I, Satija A, Willett WC, Rimm EB, Forman JP. Fruit and vegetable consumption and the incidence of hypertension in three prospective cohort studies. *Hypertension*. 2016;67:288-293.
12. Kim J, Kim J. Association between fruit and vegetable consumption and risk of hypertension in middle-aged and older Korean adults. *J Acad Nutr Diet*. 2017;04:04.
13. Auerbach BJ, Littman AJ, Tinker L, Larson J, Krieger J, Young B, Neuhaus M. Associations of 100% fruit juice versus whole fruit with hypertension and diabetes risk in postmenopausal women: Results from the women's health initiative. *Preventive medicine*. 2017;105:212-218.
14. Koochakpoor GM, P. Daneshpour, M. S. Hosseini-Esfahani, F. Sedaghati-Khayat, B. Hosseini, S. A. Azizi, F. Dietary factors influence the association of cyclin d2 polymorphism rs11063069 with the risk of metabolic syndrome. *Nutrition Research*. 2018;52:48-56.

15. Nunez-Cordoba JM, Alonso A, Beunza JJ, Palma S, Gomez-Gracia E, Martinez-Gonzalez MA. Role of vegetables and fruits in mediterranean diets to prevent hypertension. *European Journal of Clinical Nutrition*. 2009;63:605-612.
16. Psaltopoulou T, Naska A, Orfanos P, Trichopoulos D, Mountokalakis T, Trichopoulou A. Olive oil, the mediterranean diet, and arterial blood pressure: The greek european prospective investigation into cancer and nutrition (epic) study.[erratum appears in am j clin nutr. 2005 may;81(5):1181]. *American Journal of Clinical Nutrition*. 2004;80:1012-1018.
17. Steffen LMK, C. H. Yu, X. Pereira, M. A. Slattery, M. L. Van Horn, L. Gross, M. D. Jacobs Jr, D. R. Associations of plant food, dairy product, and meat intakes with 15-y incidence of elevated blood pressure in young black and white adults: The coronary artery risk development in young adults (cardia) study. *The American journal of clinical nutrition*. 2005;82:1169-1177; quiz 1363-1364.
18. Tsubota-Utsugi MO, T. Kikuya, M. Metoki, H. Kurimoto, A. Suzuki, K. Fukushima, N. Hara, A. Asayama, K. Satoh, H. Tsubono, Y. Imai, Y. High fruit intake is associated with a lower risk of future hypertension determined by home blood pressure measurement: The ohasama study. *Journal of Human Hypertension*. 2011;25:164-171.
19. Wang LM, J. E. Gaziano, J. M. Buring, J. E. Sesso, H. D. Fruit and vegetable intake and the risk of hypertension in middle-aged and older women. *American Journal of Hypertension*. 2012;25:180-189.
20. Wang L, Manson JE, Buring JE, Lee I-M, Sesso HD. Dietary intake of dairy products, calcium, and vitamin d and the risk of hypertension in middle-aged and older women. *Hypertension*. 2008;51:1073-1079.
21. Buendia JR, Li Y, Hu FB, Cabral HJ, Bradlee ML, Quatromoni PA, Singer MR, Curhan GC, Moore LL. Long-term yogurt consumption and risk of incident hypertension in adults. *Journal of Hypertension*. 2018;36:1671-1679.
22. Alonso A, Steffen LM, Folsom AR. Dairy intake and changes in blood pressure over 9 years: The aric study. *European journal of clinical nutrition*. 2009;63:1272.
23. Engberink MF, Geleijnse JM, de Jong N, Smit HA, Kok FJ, Verschuren WM. Dairy intake, blood pressure, and incident hypertension in a general dutch population. *The Journal of nutrition*. 2009;139:582-587.
24. Kim DK, J. Dairy consumption is associated with a lower incidence of the metabolic syndrome in middle-aged and older korean adults: The korean genome and epidemiology study (koges). *British Journal of Nutrition*. 2017;117:148-160.
25. Wang H, Fox CS, Troy LM, McKeown NM, Jacques PF. Longitudinal association of dairy consumption with the changes in blood pressure and the risk of incident hypertension: The framingham heart study. *British Journal of Nutrition*. 2015;114:1887-1899.
26. Asghari G, Yuzbashian E, Mirmiran P, Bahadoran Z, Azizi F. Prediction of metabolic syndrome by a high intake of energy-dense nutrient-poor snacks in iranian children and adolescents. *Pediatric research*. 2016;79:697.
